# Supplementary material for: Plant Ecological Strategies Shift Across the Cretaceous–Paleogene Boundary
Source: PLoS Biol. 2014 Sep 16;12(9):e1001949. doi: 10.1371/journal.pbio.1001949 (PMC4165584; doi:10.1371/journal.pbio.1001949)
Supplement: Data S1 — VD data for all measured specimens. (CSV) [file pbio.1001949.s005.csv]

Species	Location	VD	Specimen	Facies	Megafloral.Zone	depth	FullName
HC209	DMNH-434	2.97	DMNH-18653	channel la	HCIa	-88.5	Platanaceae
HC209	DMNH-434	2.97	DMNH-18653	channel la	HCIa	-88.5	Platanaceae
HC86	DMNH-1851	2.68	DMNH-18682B	channel la	HCIa	-80	Leepierceia preartocarpoides
HC86	DMNH-1851	3.11	DMNH-18682A	channel la	HCIa	-80	Leepierceia preartocarpoides
HC212	DMNH-1852	3.66	DMNH-18723	channel la	HCIa	-75	Cercidiphyllum ellipticum
HC86	DMNH-430	3.42	DMNH-18772	channel la	HCIa	-75	Leepierceia preartocarpoides
HC86	DMNH-430	3.42	DMNH-18772	channel la	HCIa	-75	Leepierceia preartocarpoides
HC86	DMNH-430	2.69	DMNH-18768	channel la	HCIa	-75	Leepierceia preartocarpoides
HC86	DMNH-430	2.69	DMNH-18768	channel la	HCIa	-75	Leepierceia preartocarpoides
HC99	DMNH-430	1.88	DMNH-18783	channel la	HCIa	-75	Platanaceae
HC99	DMNH-430	1.88	DMNH-18783	channel la	HCIa	-75	Platanaceae
HC1	DMNH-569	2.82	DMNH-8473	channel la	HCIII	-65	Platanites marginata
HC1	DMNH-569	2.28	DMNH-8477	channel la	HCIII	-65	Platanites marginata
HC1	DMNH-569	3.32	DMNH-8472	channel la	HCIII	-65	Platanites marginata
HC1	DMNH-569	3.52	DMNH-8478	channel la	HCIII	-65	Platanites marginata
HC1	DMNH-569	3.39	DMNH-8495	channel la	HCIII	-65	Platanites marginata
HC1	DMNH-571	2.62	DMNH-7647	channel la	HCIa	-65	Platanites marginata
HC210	DMNH-571	1.75	DMNH-2133	channel la	HCIa	-65	Dicotyledones
HC49	DMNH-571	3.04	DMNH-7646	channel la	HCIa	-65	'Dryophyllum' subfalcatum
HC49	DMNH-569	2.55	DMNH-8492	channel la	HCIII	-65	'Dryophyllum' subfalcatum
HC57-64	DMNH-571	3.21	DMNH-11002	channel la	HCIa	-65	Erlingdorfia montana
HC57-64	DMNH-571	2.49	DMNH-11014	channel la	HCIa	-65	Erlingdorfia montana
HC57-64	DMNH-571	2.97	DMNH-13005	channel la	HCIa	-65	Erlingdorfia montana
HC57-64	DMNH-571	3.37	DMNH-11005	channel la	HCIa	-65	Erlingdorfia montana
HC57-64	DMNH-571	2.42	DMNH-18835	channel la	HCIa	-65	Erlingdorfia montana
HC57-64	DMNH-571	2.48	DMNH-11013	channel la	HCIa	-65	Erlingdorfia montana
HC99	DMNH-571	3.31	DMNH-11024	channel la	HCIa	-65	Platanaceae
HC99	DMNH-571	2.9	DMNH-11022	channel la	HCIa	-65	Platanaceae
HC108	DMNH-572	2.86	DMNH-18824	channel la	HCIa	-61.7	aff. 'Vitis' stantonii
HC49	DMNH-572	4.54	DMNH-18818	channel la	HCIa	-61.7	'Dryophyllum' subfalcatum
HC86	DMNH-572	2.95	DMNH-18794	channel la	HCIa	-61.7	Leepierceia preartocarpoides
HC131	DMNH-567	5.67	DMNH-19385	channel la	HCIb	-56.75	Dicotyledones
HC131	DMNH-567	5.67	DMNH-19385	channel la	HCIb	-56.75	Dicotyledones
HC135	DMNH-1491	3.12	DMNH-18897	channel la	HCIb	-56.75	Dicotyledones
HC211	DMNH-1491	3.59	DMNH-19039-2	channel la	HCIb	-56.75	Rosidae
HC211	DMNH-1491	3.52	DMNH-19039	channel la	HCIb	-56.75	Rosidae
HC212	DMNH-1491	3.76	DMNH-13016	channel la	HCIb	-56.75	Cercidiphyllum ellipticum
HC212	DMNH-1491	3.36	DMNH-19063	channel la	HCIb	-56.75	Cercidiphyllum ellipticum
HC212	DMNH-2204	3.38	DMNH-19117	channel la	HCIb	-56.75	Cercidiphyllum ellipticum
HC212	DMNH-1491	3.54	DMNH-13034	channel la	HCIb	-56.75	Cercidiphyllum ellipticum
HC212	DMNH-1491	3.64	DMNH-19058	channel la	HCIb	-56.75	Cercidiphyllum ellipticum
HC212	DMNH-2203	3.73	DMNH-19469	channel la	HCIb	-56.75	Cercidiphyllum ellipticum
HC212	DMNH-1491	3.22	DMNH-19071	channel la	HCIb	-56.75	Cercidiphyllum ellipticum
HC212	DMNH-1491	3.86	DMNH-19072	channel la	HCIb	-56.75	Cercidiphyllum ellipticum
HC212	DMNH-1491	3.97	DMNH-13108	channel la	HCIb	-56.75	Cercidiphyllum ellipticum
HC212	DMNH-2204	3.83	DMNH-19115	channel la	HCIb	-56.75	Cercidiphyllum ellipticum
HC212	DMNH-2203	3.56	DMNH-19460	channel la	HCIb	-56.75	Cercidiphyllum ellipticum
HC212	DMNH-1491	3.2	DMNH-19078	channel la	HCIb	-56.75	Cercidiphyllum ellipticum
HC212	DMNH-1491	3.48	DMNH-19065	channel la	HCIb	-56.75	Cercidiphyllum ellipticum
HC212	DMNH-2203	3.63	DMNH-19471	channel la	HCIb	-56.75	Cercidiphyllum ellipticum
HC212	DMNH-1491	3.19	DMNH-19079	channel la	HCIb	-56.75	Cercidiphyllum ellipticum
HC212	DMNH-2203	4.12	DMNH-19465	channel la	HCIb	-56.75	Cercidiphyllum ellipticum
HC212	DMNH-1491	3.49	DMNH-19070	channel la	HCIb	-56.75	Cercidiphyllum ellipticum
HC212	DMNH-2203	3.84	DMNH-19468	channel la	HCIb	-56.75	Cercidiphyllum ellipticum
HC212	DMNH-1491	3.96	DMNH-19023	channel la	HCIb	-56.75	Cercidiphyllum ellipticum
HC212	DMNH-1491	3.7	DMNH-13034-2	channel la	HCIb	-56.75	Cercidiphyllum ellipticum
HC224	DMNH-2203	2.63	DMNH-19207	channel la	HCIb	-56.75	Rosidae
HC226	DMNH-2203	5.43	DMNH-19472	channel la	HCIb	-56.75	Ranunculaceae
HC226	DMNH-2203	3.57	DMNH-19477	channel la	HCIb	-56.75	Ranunculaceae
HC226	DMNH-567	3.86	DMNH-19421	channel la	HCIb	-56.75	Ranunculaceae
HC226	DMNH-2203	4.43	DMNH-19473	channel la	HCIb	-56.75	Ranunculaceae
HC226	DMNH-2203	4.55	DMNH-19201	channel la	HCIb	-56.75	Ranunculaceae
HC226	DMNH-567	3.86	DMNH-19421	channel la	HCIb	-56.75	Ranunculaceae
HC226	DMNH-567	3.77	DMNH-19419	channel la	HCIb	-56.75	Ranunculaceae
HC226	DMNH-567	3.75	DMNH-13147	channel la	HCIb	-56.75	Ranunculaceae
HC226	DMNH-2203	4.04	DMNH-19474	channel la	HCIb	-56.75	Ranunculaceae
HC226	DMNH-567	3.77	DMNH-19419	channel la	HCIb	-56.75	Ranunculaceae
HC226	DMNH-567	3.43	DMNH-19414	channel la	HCIb	-56.75	Ranunculaceae
HC226	DMNH-2203	3.53	DMNH-19475	channel la	HCIb	-56.75	Ranunculaceae
HC226	DMNH-567	3.75	DMNH-13147	channel la	HCIb	-56.75	Ranunculaceae
HC226	DMNH-567	3.43	DMNH-19414	channel la	HCIb	-56.75	Ranunculaceae
HC227	DMNH-567	1.06	DMNH-19174	channel la	HCIb	-56.75	Ranunculidae
HC227	DMNH-567	1.06	DMNH-19174	channel la	HCIb	-56.75	Ranunculidae
HC49	DMNH-567	2.11	DMNH-13049	channel la	HCIb	-56.75	'Dryophyllum' subfalcatum
HC49	DMNH-567	2.11	DMNH-13049	channel la	HCIb	-56.75	'Dryophyllum' subfalcatum
HC57-64	DMNH-1491	2.71	DMNH-13011	channel la	HCIb	-56.75	Erlingdorfia montana
HC81	DMNH-2203	4.52	DMNH-19597	channel la	HCIb	-56.75	Cannabaceae
HC81	DMNH-2203	3.78	DMNH-19622	channel la	HCIb	-56.75	Cannabaceae
HC81	DMNH-2203	4.72	DMNH-19512	channel la	HCIb	-56.75	Cannabaceae
HC86	DMNH-1491	3.75	DMNH-13030	channel la	HCIb	-56.75	Leepierceia preartocarpoides
HC86	DMNH-567	3.79	DMNH-19264	channel la	HCIb	-56.75	Leepierceia preartocarpoides
HC86	DMNH-1491	2.93	DMNH-19083	channel la	HCIb	-56.75	Leepierceia preartocarpoides
HC86	DMNH-1491	3.56	DMNH-13012	channel la	HCIb	-56.75	Leepierceia preartocarpoides
HC86	DMNH-567	4.02	DMNH-13237	channel la	HCIb	-56.75	Leepierceia preartocarpoides
HC86	DMNH-567	4.02	DMNH-13237	channel la	HCIb	-56.75	Leepierceia preartocarpoides
HC86	DMNH-567	3.79	DMNH-19264	channel la	HCIb	-56.75	Leepierceia preartocarpoides
HC86	DMNH-1491	3.35	DMNH-13017	channel la	HCIb	-56.75	Leepierceia preartocarpoides
HC86	DMNH-1491	3.38	DMNH-13020	channel la	HCIb	-56.75	Leepierceia preartocarpoides
HC90	DMNH-1491	2.91	DMNH-19048	channel la	HCIb	-56.75	Rosidae?
HC90	DMNH-1491	2.85	DMNH-19050	channel la	HCIb	-56.75	Rosidae?
HC90	DMNH-1491	1.93	DMNH-19047	channel la	HCIb	-56.75	Rosidae?
HC92	DMNH-567	5.61	DMNH-19345	channel la	HCIb	-56.75	'Cinnamomum' lineafolia
HC92	DMNH-1491	3.12	DMNH-18948	channel la	HCIb	-56.75	'Cinnamomum' lineafolia
HC92	DMNH-2204	3.49	DMNH-19121	channel la	HCIb	-56.75	'Cinnamomum' lineafolia
HC92	DMNH-1491	3.01	DMNH-18940	channel la	HCIb	-56.75	'Cinnamomum' lineafolia
HC92	DMNH-2204	2.93	DMNH-19136	channel la	HCIb	-56.75	'Cinnamomum' lineafolia
HC92	DMNH-567	5.67	DMNH-13038	channel la	HCIb	-56.75	'Cinnamomum' lineafolia
HC92	DMNH-1491	3.15	DMNH-18937	channel la	HCIb	-56.75	'Cinnamomum' lineafolia
HC92	DMNH-567	5.61	DMNH-19345	channel la	HCIb	-56.75	'Cinnamomum' lineafolia
HC92	DMNH-567	3.71	DMNH-19353	channel la	HCIb	-56.75	'Cinnamomum' lineafolia
HC92	DMNH-1491	4.44	DMNH-18941	channel la	HCIb	-56.75	'Cinnamomum' lineafolia
HC92	DMNH-1491	3.17	DMNH-18953	channel la	HCIb	-56.75	'Cinnamomum' lineafolia
HC92	DMNH-567	3.71	DMNH-19353	channel la	HCIb	-56.75	'Cinnamomum' lineafolia
HC92	DMNH-1491	3.59	DMNH-18955	channel la	HCIb	-56.75	'Cinnamomum' lineafolia
HC92	DMNH-567	5.67	DMNH-13038	channel la	HCIb	-56.75	'Cinnamomum' lineafolia
HC94	DMNH-567	4.39	DMNH-19374	channel la	HCIb	-56.75	'Celastrus' taurenensis
HC94	DMNH-567	4.39	DMNH-19374	channel la	HCIb	-56.75	'Celastrus' taurenensis
HC94	DMNH-1491	4.07	DMNH-19055	channel la	HCIb	-56.75	'Celastrus' taurenensis
HC94	DMNH-2204	3.92	DMNH-19127	channel la	HCIb	-56.75	'Celastrus' taurenensis
HC86	DMNH-1492	3.31	DMNH-11032	channel x	HCIa	-50	Leepierceia preartocarpoides
HC86	DMNH-1492	3.84	DMNH-11025	channel x	HCIa	-50	Leepierceia preartocarpoides
HC212	DMNH-897	1.62	DMNH-21400	channel la	HCIIa	-47.75	Cercidiphyllum ellipticum
HC262	DMNH-897	4.43	DMNH-19956B	channel la	HCIIa	-47.75	Dicotyledones
HC262	DMNH-897	3.13	DMNH-19956A	channel la	HCIIa	-47.75	Dicotyledones
HC49	DMNH-897	3.08	DMNH-19951	channel la	HCIIa	-47.75	'Dryophyllum' subfalcatum
HC49	DMNH-2092	3.66	DMNH-21323	pond	HCIIa	-46.89	'Dryophyllum' subfalcatum
HC49	DMNH-2092	2.56	DMNH-21326	pond	HCIIa	-46.89	'Dryophyllum' subfalcatum
HC62	DMNH-2092	3.45	DMNH-21337	pond	HCIIa	-46.89	'Rhamnus' cleburni
HC62	DMNH-2092	3.94	DMNH-21351	pond	HCIIa	-46.89	'Rhamnus' cleburni
HC108	DMNH-2196	3.92	DMNH-21044-2	channel la	HCIIb	-42.485	aff. 'Vitis' stantonii
HC108	DMNH-2196	4.29	DMNH-21043	channel la	HCIIb	-42.485	aff. 'Vitis' stantonii
HC140	DMNH-2195	3.98	DMNH-21047	channel x	HCIIb	-42.485	Platanaceae
HC49	DMNH-2197	3.74	DMNH-21053	channel la	HCII?	-42.485	'Dryophyllum' subfalcatum
HC62	DMNH-2088	3.69	DMNH-19262	channel la	HCIIb	-38.485	'Rhamnus' cleburni
FU43	DMNH-2087	5.14	DMNH-21169	channel la	HCIIb	-36.885	Ziziphoides flabella
FU43	DMNH-2087	5.11	DMNH-21169-2	channel la	HCIIb	-36.885	Ziziphoides flabella
FU5	DMNH-2087	6.3	DMNH-21166	channel la	HCIIb	-36.885	Cercidiphyllum genetrix
HC124	DMNH-2087	4.37	DMNH-21171	channel la	HCIIb	-36.885	aff. Cercidiphyllum
HC14	DMNH-2087	2.65	DMNH-21225-2	channel la	HCIIb	-36.885	'Vitis' stantonii
HC14	DMNH-2087	3.1	DMNH-21225	channel la	HCIIb	-36.885	'Vitis' stantonii
HC14	DMNH-2087	2.73	DMNH-21224	channel la	HCIIb	-36.885	'Vitis' stantonii
HC212	DMNH-2087	3.22	DMNH-21147	channel la	HCIIb	-36.885	Cercidiphyllum ellipticum
HC212	DMNH-2087	3.11	KJ9727	channel la	HCIIb	-36.885	Cercidiphyllum ellipticum
HC226	DMNH-2087	3.25	DMNH-21191	channel la	HCIIb	-36.885	Ranunculaceae
HC243	DMNH-2087	3.65	DMNH-19230	channel la	HCIIb	-36.885	Cannabaceae
HC243	DMNH-2087	4.26	DMNH-21107	channel la	HCIIb	-36.885	Cannabaceae
HC300	DMNH-2087	4.03	DMNH-19741	channel la	HCIIb	-36.885	Dicotyledones
HC47	DMNH-2087	2.24	DMNH-21160	channel la	HCIIb	-36.885	Rosidae
HC49	DMNH-2087	3.54	DMNH-21161	channel la	HCIIb	-36.885	'Dryophyllum' subfalcatum
HC49	DMNH-2087	4.85	DMNH-21157	channel la	HCIIb	-36.885	'Dryophyllum' subfalcatum
HC49	DMNH-2087	3.22	DMNH-21162	channel la	HCIIb	-36.885	'Dryophyllum' subfalcatum
HC62	DMNH-2087	4.02	DMNH-21152	channel la	HCIIb	-36.885	'Rhamnus' cleburni
HC62	DMNH-2087	5.11	DMNH-19968	channel la	HCIIb	-36.885	'Rhamnus' cleburni
HC57-64	DMNH-566	2.78	DMNH-20687	floodplain soil	HCIIa	-35.2	Erlingdorfia montana
HC57-64	DMNH-566	2.78	DMNH-20687	floodplain soil	HCIIa	-35.2	Erlingdorfia montana
HC86	DMNH-566	2.28	DMNH-13622	floodplain soil	HCIIa	-35.2	Leepierceia preartocarpoides
HC86	DMNH-566	2.87	DMNH-20702	floodplain soil	HCIIa	-35.2	Leepierceia preartocarpoides
HC86	DMNH-566	2.28	DMNH-13622	floodplain soil	HCIIa	-35.2	Leepierceia preartocarpoides
HC86	DMNH-566	2.87	DMNH-20702	floodplain soil	HCIIa	-35.2	Leepierceia preartocarpoides
HC86	DMNH-566	3.47	DMNH-20656	floodplain soil	HCIIa	-35.2	Leepierceia preartocarpoides
HC86	DMNH-566	3.47	DMNH-20656	floodplain soil	HCIIa	-35.2	Leepierceia preartocarpoides
HC57-64	DMNH-568	2.25	DMNH-20472	channel x	HCIIa	-34.55	Erlingdorfia montana
HC57-64	DMNH-568	2.25	DMNH-20472	channel x	HCIIa	-34.55	Erlingdorfia montana
HC57-64	DMNH-568	2.33	DMNH-20473	channel x	HCIIa	-34.55	Erlingdorfia montana
HC57-64	DMNH-568	2.89	DMNH-8409	channel x	HCIIa	-34.55	Erlingdorfia montana
HC57-64	DMNH-568	2.89	DMNH-8409	channel x	HCIIa	-34.55	Erlingdorfia montana
HC57-64	DMNH-568	2.19	DMNH-20471	channel x	HCIIa	-34.55	Erlingdorfia montana
HC57-64	DMNH-568	2.87	DMNH-8444	channel x	HCIIa	-34.55	Erlingdorfia montana
HC57-64	DMNH-568	3.42	DMNH-20493	channel x	HCIIa	-34.55	Erlingdorfia montana
HC57-64	DMNH-568	2.33	DMNH-20473	channel x	HCIIa	-34.55	Erlingdorfia montana
HC57-64	DMNH-568	3.4	DMNH-20474	channel x	HCIIa	-34.55	Erlingdorfia montana
HC57-64	DMNH-568	3.4	DMNH-20474	channel x	HCIIa	-34.55	Erlingdorfia montana
HC57-64	DMNH-568	2.87	DMNH-8444	channel x	HCIIa	-34.55	Erlingdorfia montana
HC57-64	DMNH-568	3.9	DMNH-20074	channel x	HCIIa	-34.55	Erlingdorfia montana
HC57-64	DMNH-568	2.99	DMNH-6257	channel x	HCIIa	-34.55	Erlingdorfia montana
HC57-64	DMNH-568	2.99	DMNH-6257	channel x	HCIIa	-34.55	Erlingdorfia montana
HC57-64	DMNH-568	3.9	DMNH-20074	channel x	HCIIa	-34.55	Erlingdorfia montana
HC57-64	DMNH-568	2.19	DMNH-20471	channel x	HCIIa	-34.55	Erlingdorfia montana
HC57-64	DMNH-568	3.42	DMNH-20493	channel x	HCIIa	-34.55	Erlingdorfia montana
HC62	DMNH-568	3.77	DMNH-20485	channel x	HCIIa	-34.55	'Rhamnus' cleburni
HC62	DMNH-568	2.95	DMNH-20486	channel x	HCIIa	-34.55	'Rhamnus' cleburni
HC62	DMNH-568	3.77	DMNH-20485	channel x	HCIIa	-34.55	'Rhamnus' cleburni
HC62	DMNH-568	2.95	DMNH-20486	channel x	HCIIa	-34.55	'Rhamnus' cleburni
HC86	DMNH-568	3.13	DMNH-8419	channel x	HCIIa	-34.55	Leepierceia preartocarpoides
HC86	DMNH-568	3.13	DMNH-8419	channel x	HCIIa	-34.55	Leepierceia preartocarpoides
HC103	DMNH-1489	3.98	DMNH-20614	channel la	HCIIa	-33.7	Trochodendroides nebrascensis
HC49	DMNH-1489	2.72	DMNH-20558	channel la	HCIIa	-33.7	'Dryophyllum' subfalcatum
HC49	DMNH-1489	2.2	DMNH-20554	channel la	HCIIa	-33.7	'Dryophyllum' subfalcatum
HC49	DMNH-1489	3.53	DMNH-20552-2	channel la	HCIIa	-33.7	'Dryophyllum' subfalcatum
HC49	DMNH-1490	2.37	DMNH-20623	channel la	HCIIa	-33.7	'Dryophyllum' subfalcatum
HC49	DMNH-1489	3.85	DMNH-20546	channel la	HCIIa	-33.7	'Dryophyllum' subfalcatum
HC49	DMNH-1489	2.39	DMNH-20555	channel la	HCIIa	-33.7	'Dryophyllum' subfalcatum
HC49	DMNH-1489	3.17	DMNH-20552	channel la	HCIIa	-33.7	'Dryophyllum' subfalcatum
HC49	DMNH-1489	2.85	DMNH-20551	channel la	HCIIa	-33.7	'Dryophyllum' subfalcatum
HC57-64	DMNH-1490	2.63	DMNH-20629	channel la	HCIIa	-33.7	Erlingdorfia montana
HC62	DMNH-1489	4.63	DMNH-20592	channel la	HCIIa	-33.7	'Rhamnus' cleburni
HC76	DMNH-1489	3.95	DMNH-20563	channel la	HCIIa	-33.7	Dicotyledones
HC62	DMNH-432	3.26	DMNH-20510	channel la	HCIIa	-33.2	'Rhamnus' cleburni
HC62	DMNH-432	3.26	DMNH-20510	channel la	HCIIa	-33.2	'Rhamnus' cleburni
HC20	DMNH-2096	3.4	DMNH-20519A	floodplain soil	HCIIa	-33.195	Rosidae
HC267	DMNH-2097	2.84	DMNH-20978-2	channel la	HCIIa	-31.395	Dicotyledones
HC267	DMNH-2097	3.04	DMNH-20978-1	channel la	HCIIa	-31.395	Dicotyledones
HC290	DMNH-2097	2.45	DMNH-21016	channel la	HCIIa	-31.395	Dicotyledones
HC290	DMNH-2097	3.93	DMNH-21010A	channel la	HCIIa	-31.395	Dicotyledones
HC290	DMNH-2097	0.66	DMNH-21006	channel la	HCIIa	-31.395	Dicotyledones
HC290	DMNH-2097	2.98	DMNH-21020	channel la	HCIIa	-31.395	Dicotyledones
HC290	DMNH-2097	3.42	DMNH-21013	channel la	HCIIa	-31.395	Dicotyledones
HC49	DMNH-2097	3.08	DMNH-20981	channel la	HCIIa	-31.395	'Dryophyllum' subfalcatum
HC49	DMNH-2097	2.69	DMNH-20979	channel la	HCIIa	-31.395	'Dryophyllum' subfalcatum
HC49	DMNH-2097	3.19	DMNH-20995	channel la	HCIIa	-31.395	'Dryophyllum' subfalcatum
HC49	DMNH-2097	3.85	DMNH-20978	channel la	HCIIa	-31.395	'Dryophyllum' subfalcatum
HC49	DMNH-2097	3.48	DMNH-20953	channel la	HCIIa	-31.395	'Dryophyllum' subfalcatum
HC49	DMNH-2097	4.38	DMNH-19988-2	channel la	HCIIa	-31.395	'Dryophyllum' subfalcatum
HC49	DMNH-2097	2.75	DMNH-21010B	channel la	HCIIa	-31.395	'Dryophyllum' subfalcatum
HC49	DMNH-2097	2.3	DMNH-19988-1	channel la	HCIIa	-31.395	'Dryophyllum' subfalcatum
HC49	DMNH-2097	2.9	DMNH-19986	channel la	HCIIa	-31.395	'Dryophyllum' subfalcatum
HC57-64	DMNH-2097	2.28	DMNH-20945	channel la	HCIIa	-31.395	Erlingdorfia montana
HC57-64	DMNH-2097	3.85	DMNH-20958	channel la	HCIIa	-31.395	Erlingdorfia montana
HC57-64	DMNH-2097	2.67	DMNH-20942	channel la	HCIIa	-31.395	Erlingdorfia montana
HC57-64	DMNH-2097	2.4	DMNH-20944	channel la	HCIIa	-31.395	Erlingdorfia montana
HC57-64	DMNH-2097	3.32	DMNH-20940	channel la	HCIIa	-31.395	Erlingdorfia montana
HC62	DMNH-2097	2.81	DMNH-20963	channel la	HCIIa	-31.395	'Rhamnus' cleburni
HC62	DMNH-2097	2.98	DMNH-19981	channel la	HCIIa	-31.395	'Rhamnus' cleburni
HC62	DMNH-2097	2.42	DMNH-20970	channel la	HCIIa	-31.395	'Rhamnus' cleburni
HC62	DMNH-2097	3.88	DMNH-21034	channel la	HCIIa	-31.395	'Rhamnus' cleburni
HC62	DMNH-2097	4.84	DMNH-20959	channel la	HCIIa	-31.395	'Rhamnus' cleburni
HC62	DMNH-2097	3.45	DMNH-21035	channel la	HCIIa	-31.395	'Rhamnus' cleburni
HC14	DMNH-901	3.02	DMNH-19980	channel la	HCIIb	-30.75	'Vitis' stantonii
HC14	DMNH-901	3.02	DMNH-19980	channel la	HCIIb	-30.75	'Vitis' stantonii
HC49	DMNH-901	2.98	DMNH-20526	channel la	HCIIb	-30.75	'Dryophyllum' subfalcatum
HC49	DMNH-901	2.98	DMNH-20526	channel la	HCIIb	-30.75	'Dryophyllum' subfalcatum
HC303	DMNH-431	4.13	DMNH-19768	channel la	HCIIa	-30.7	Dicotyledones
HC49	DMNH-431	2.49	DMNH-6267	channel la	HCIIa	-30.7	'Dryophyllum' subfalcatum
HC57-64	DMNH-431	2.71	DMNH-20916	channel la	HCIIa	-30.7	Erlingdorfia montana
HC57-64	DMNH-431	3.54	DMNH-6263A	channel la	HCIIa	-30.7	Erlingdorfia montana
HC57-64	DMNH-431	2.65	DMNH-20924	channel la	HCIIa	-30.7	Erlingdorfia montana
HC57-64	DMNH-431	3.01	DMNH-6267	channel la	HCIIa	-30.7	Erlingdorfia montana
HC57-64	DMNH-431	2.49	DMNH-20914	channel la	HCIIa	-30.7	Erlingdorfia montana
HC86	DMNH-431	2.65	DMNH-6267	channel la	HCIIa	-30.7	Leepierceia preartocarpoides
HC49	DMNH-2215	4.77	DMNH-20735	channel la	HCIIa	-26.46	'Dryophyllum' subfalcatum
HC14	DMNH-908	3.13	DMNH-20910	aban chan	HCIIb	-24.75	'Vitis' stantonii
HC14	DMNH-908	3.13	DMNH-20910	aban chan	HCIIb	-24.75	'Vitis' stantonii
HC105	DMNH-1781	4.28	DMNH-20412	channel la	HCIII	-23.44	Marmarthia trivialis
HC105	DMNH-1781	4.65	DMNH-20408	channel la	HCIII	-23.44	Marmarthia trivialis
HC111	DMNH-1781	3.51	DMNH-20878	channel la	HCIII	-23.44	Paranymphaea hastata
HC111	DMNH-1781	3.53	DMNH-20418	channel la	HCIII	-23.44	Paranymphaea hastata
HC162	DMNH-1781	3.2	DMNH-20862	channel la	HCIII	-23.44	Marmarthia pearsonii
HC200	DMNH-1781	3.42	DMNH-20874	channel la	HCIII	-23.44	Bisonia niemii
HC200	DMNH-1781	3.65	DMNH-20878	channel la	HCIII	-23.44	Bisonia niemii
HC200	DMNH-1781	3.64	DMNH-20876	channel la	HCIII	-23.44	Bisonia niemii
HC200	DMNH-1781	3.34	DMNH-19991	channel la	HCIII	-23.44	Bisonia niemii
HC200	DMNH-1781	3.22	DMNH-20873	channel la	HCIII	-23.44	Bisonia niemii
HC200	DMNH-1781	3.64	DMNH-20879	channel la	HCIII	-23.44	Bisonia niemii
HC290	DMNH-1781	2.91	DMNH-20855	channel la	HCIII	-23.44	Dicotyledones
HC4	DMNH-1781	3.61	DMNH-20847	channel la	HCIII	-23.44	'Ficus' planicostata
HC49	DMNH-2214	2.75	DMNH-20734-1	channel la	HCIII	-21.14	'Dryophyllum' subfalcatum
HC49	DMNH-2214	3.45	DMNH-20734-4	channel la	HCIII	-21.14	'Dryophyllum' subfalcatum
HC49	DMNH-2214	3.3	DMNH-20734-2	channel la	HCIII	-21.14	'Dryophyllum' subfalcatum
HC49	DMNH-2214	3.76	DMNH-20734-3	channel la	HCIII	-21.14	'Dryophyllum' subfalcatum
HC57-64	DMNH-2214	3.03	DMNH-20734	channel la	HCIII	-21.14	Erlingdorfia montana
HC14	DMNH-1855	3.87	DMNH-21812	channel la	HCIII	-20.75	'Vitis' stantonii
HC14	DMNH-1855	2.97	DMNH-21810	channel la	HCIII	-20.75	'Vitis' stantonii
HC14	DMNH-1855	3.12	DMNH-21809	channel la	HCIII	-20.75	'Vitis' stantonii
HC14	DMNH-1855	3.44	DMNH-21803	channel la	HCIII	-20.75	'Vitis' stantonii
HC14	DMNH-1855	2.78	DMNH-21799	channel la	HCIII	-20.75	'Vitis' stantonii
HC14	DMNH-1855	2.63	DMNH-21786	channel la	HCIII	-20.75	'Vitis' stantonii
HC14	DMNH-1855	2.39	DMNH-20003A	channel la	HCIII	-20.75	'Vitis' stantonii
HC14	DMNH-1855	3.06	DMNH-20006	channel la	HCIII	-20.75	'Vitis' stantonii
HC249	DMNH-1855	3.14	DMNH-20008	channel la	HCIII	-20.75	Dicotyledones
HC249	DMNH-1855	2.05	DMNH-19236	channel la	HCIII	-20.75	Dicotyledones
HC250	DMNH-1855	3.02	DMNH-19237	channel la	HCIII	-20.75	Dicotyledones
HC250	DMNH-1855	2.82	DMNH-20006-2	channel la	HCIII	-20.75	Dicotyledones
HC250	DMNH-1855	3	DMNH-20006	channel la	HCIII	-20.75	Dicotyledones
HC254	DMNH-1855	3.78	DMNH-19238	channel la	HCIII	-20.75	Dicotyledones
HC254	DMNH-1855	5.04	DMNH-20002	channel la	HCIII	-20.75	Dicotyledones
HC254	DMNH-1855	3.54	DMNH-21821	channel la	HCIII	-20.75	Dicotyledones
HC254	DMNH-1855	2.92	DMNH-19239	channel la	HCIII	-20.75	Dicotyledones
HC49	DMNH-1855	3.86	DMNH-21799	channel la	HCIII	-20.75	'Dryophyllum' subfalcatum
HC49	DMNH-1855	3.35	DMNH-21798	channel la	HCIII	-20.75	'Dryophyllum' subfalcatum
HC49	DMNH-1855	3.43	DMNH-20008	channel la	HCIII	-20.75	'Dryophyllum' subfalcatum
HC94	DMNH-1855	2.96	DMNH-19999	channel la	HCIII	-20.75	'Celastrus' taurenensis
HC105	DMNH-906	5.24	DMNH-20723	channel x	HCIII	-20.7	Marmarthia trivialis
HC1	DMNH-1250	4.23	DMNH-20746	channel la	HCIII	-18.7	Platanites marginata
HC103	DMNH-1250	4.5	DMNH-20761	channel la	HCIII	-18.7	Trochodendroides nebrascensis
HC105	DMNH-1250	5.18	DMNH-20743	channel la	HCIII	-18.7	Marmarthia trivialis
HC49	DMNH-1250	4.44	DMNH-20747	channel la	HCIII	-18.7	'Dryophyllum' subfalcatum
HC1	DMNH-2099	2.57	DMNH-21756	channel la	HCIII	-17.075	Platanites marginata
HC1	DMNH-2099	3.02	DMNH-21758	channel la	HCIII	-17.075	Platanites marginata
HC1	DMNH-2099	3.02	DMNH-21758	channel la	HCIII	-17.075	Platanites marginata
HC1	DMNH-2099	2.57	DMNH-21756	channel la	HCIII	-17.075	Platanites marginata
HC111	DMNH-2099	4	DMNH-21735	channel la	HCIII	-17.075	Paranymphaea hastata
HC111	DMNH-2099	4	DMNH-21735	channel la	HCIII	-17.075	Paranymphaea hastata
HC62	DMNH-2099	3.84	DMNH-21779	channel la	HCIII	-17.075	'Rhamnus' cleburni
HC62	DMNH-2099	3.84	DMNH-21779	channel la	HCIII	-17.075	'Rhamnus' cleburni
HC1	DMNH-517	3.05	KJ9239	channel la	HCIII	-16.2	Platanites marginata
HC1	DMNH-517	4.35	DMNH-6236	channel la	HCIII	-16.2	Platanites marginata
HC1	DMNH-517	3.19	DMNH-6232	channel la	HCIII	-16.2	Platanites marginata
HC1	DMNH-517	2.64	DMNH-6221	channel la	HCIII	-16.2	Platanites marginata
HC1	DMNH-517	2.81	DMNH-6228	channel la	HCIII	-16.2	Platanites marginata
HC162	DMNH-517	3.15	KJ9239	channel la	HCIII	-16.2	Marmarthia pearsonii
HC162	DMNH-517	2.53	DMNH-6215	channel la	HCIII	-16.2	Marmarthia pearsonii
HC200	DMNH-517	4.6	DMNH-6304	channel la	HCIII	-16.2	Bisonia niemii
HC200	DMNH-517	3.7	DMNH-6318	channel la	HCIII	-16.2	Bisonia niemii
HC200	DMNH-517	3.77	DMNH-NA3	channel la	HCIII	-16.2	Bisonia niemii
HC43	DMNH-517	3.01	DMNH-20790	channel la	HCIII	-16.2	Magnoliidae
HC43	DMNH-517	2.52	DMNH-20788	channel la	HCIII	-16.2	Magnoliidae
HC57-64	DMNH-517	2.83	DMNH-19997	channel la	HCIII	-16.2	Erlingdorfia montana
FU47	DMNH-428	1.77	DMNH-20096	channel x	HCIII	-15	Dicotyledones
FU47	DMNH-428	1.94	DMNH-20099	channel x	HCIII	-15	Dicotyledones
FU47	DMNH-428	1.77	DMNH-20096	channel x	HCIII	-15	Dicotyledones
FU47	DMNH-428	2.47	DMNH-6838	channel x	HCIII	-15	Dicotyledones
FU47	DMNH-428	2.47	DMNH-6838	channel x	HCIII	-15	Dicotyledones
FU47	DMNH-428	1.94	DMNH-20099	channel x	HCIII	-15	Dicotyledones
HC1	DMNH-428	3.28	DMNH-20259	channel x	HCIII	-15	Platanites marginata
HC1	DMNH-428	3.28	DMNH-20259	channel x	HCIII	-15	Platanites marginata
HC105	DMNH-428	3.31	DMNH-7459	channel x	HCIII	-15	Marmarthia trivialis
HC105	DMNH-428	3.31	DMNH-7459	channel x	HCIII	-15	Marmarthia trivialis
HC105	DMNH-428	3.89	DMNH-13616	channel x	HCIII	-15	Marmarthia trivialis
HC105	DMNH-428	4.19	DMNH-6785	channel x	HCIII	-15	Marmarthia trivialis
HC105	DMNH-428	3.89	DMNH-13616	channel x	HCIII	-15	Marmarthia trivialis
HC105	DMNH-428	4.19	DMNH-6785	channel x	HCIII	-15	Marmarthia trivialis
HC166	DMNH-428	5.04	DMNH-7453	channel x	HCIII	-15	Liriodendrites bradacii
HC166	DMNH-428	5.34	DMNH-6880	channel x	HCIII	-15	Liriodendrites bradacii
HC166	DMNH-428	5.04	DMNH-7453	channel x	HCIII	-15	Liriodendrites bradacii
HC166	DMNH-428	5.34	DMNH-6880	channel x	HCIII	-15	Liriodendrites bradacii
HC180	DMNH-428	5.14	DMNH-7543	channel x	HCIII	-15	Cissites puilosokensis
HC180	DMNH-428	5.29	DMNH-7505	channel x	HCIII	-15	Cissites puilosokensis
HC180	DMNH-428	5.29	DMNH-7505	channel x	HCIII	-15	Cissites puilosokensis
HC180	DMNH-428	5.14	DMNH-7543	channel x	HCIII	-15	Cissites puilosokensis
HC199	DMNH-428	3.7	DMNH-13632	channel x	HCIII	-15	Laurales
HC199	DMNH-428	3.39	DMNH-20195	channel x	HCIII	-15	Laurales
HC199	DMNH-428	3.7	DMNH-13632	channel x	HCIII	-15	Laurales
HC199	DMNH-428	2.78	DMNH-7424	channel x	HCIII	-15	Laurales
HC199	DMNH-428	3.39	DMNH-20195	channel x	HCIII	-15	Laurales
HC199	DMNH-428	2.78	DMNH-7424	channel x	HCIII	-15	Laurales
HC199	DMNH-428	3.25	DMNH-20211	channel x	HCIII	-15	Laurales
HC199	DMNH-428	3.25	DMNH-20211	channel x	HCIII	-15	Laurales
HC2	DMNH-428	3.07	DMNH-20245	channel x	HCIII	-15	Grewiopsis saportana
HC2	DMNH-428	3.07	DMNH-20245	channel x	HCIII	-15	Grewiopsis saportana
HC200	DMNH-428	3.46	DMNH-6927	channel x	HCIII	-15	Bisonia niemii
HC200	DMNH-428	3.46	DMNH-6927	channel x	HCIII	-15	Bisonia niemii
HC261	DMNH-428	3.33	DMNH-20235	channel x	HCIII	-15	Rhamnaceae
HC261	DMNH-428	3.33	DMNH-20235	channel x	HCIII	-15	Rhamnaceae
HC280	DMNH-428	3.31	DMNH-7401	channel x	HCIII	-15	Dicotyledones
HC280	DMNH-428	3.31	DMNH-7401	channel x	HCIII	-15	Dicotyledones
HC62	DMNH-428	3.79	DMNH-7513	channel x	HCIII	-15	'Rhamnus' cleburni
HC62	DMNH-428	3.79	DMNH-7513	channel x	HCIII	-15	'Rhamnus' cleburni
HC369	DMNH-2306	2.64	DMNH-19894	channel la	HCIII	-12.4	Dicotyledones
HC1	DMNH-1782	3.46	DMNH-21583	channel x	HCIII	-11.14	Platanites marginata
HC103	DMNH-2094	4.81	DMNH-21682	channel la	HCIII	-10.61	Trochodendroides nebrascensis
HC250	DMNH-2094	5.54	DMNH-22772	channel la	HCIII	-10.61	Dicotyledones
HC321	DMNH-2094	4.41	DMNH-21691	channel la	HCIII	-10.61	Dicotyledones
HC321	DMNH-2094	2.81	DMNH-19870	channel la	HCIII	-10.61	Dicotyledones
HC1	DMNH-2091	3.23	DMNH-21619	floodplain soil	HCIII	-10.07	Platanites marginata
FU81	DMNH-2098	2.4	DMNH-20021	pond	HCIII	-6.045	Dicotyledones
HC179	DMNH-2098	3.09	DMNH-21426	pond	HCIII	-6.045	'Artocarpus' lessigiana
HC266	DMNH-2098	2.89	DMNH-21475	pond	HCIII	-6.045	Dicotyledones
HC266	DMNH-2098	3.56	DMNH-21501	pond	HCIII	-6.045	Dicotyledones
HC266	DMNH-2098	3.81	DMNH-21502	pond	HCIII	-6.045	Dicotyledones
HC266	DMNH-2098	2.57	DMNH-21483-2	pond	HCIII	-6.045	Dicotyledones
HC266	DMNH-2098	3.2	DMNH-21483-1	pond	HCIII	-6.045	Dicotyledones
HC266	DMNH-2098	2.8	DMNH-19250	pond	HCIII	-6.045	Dicotyledones
HC266	DMNH-2098	3.97	DMNH-21506	pond	HCIII	-6.045	Dicotyledones
HC266	DMNH-2098	3.01	DMNH-21505	pond	HCIII	-6.045	Dicotyledones
HC266	DMNH-2098	3.34	DMNH-21500	pond	HCIII	-6.045	Dicotyledones
HC266	DMNH-2098	3.99	DMNH-21491	pond	HCIII	-6.045	Dicotyledones
HC43	DMNH-440	3.62	DMNH-22809	splay	HCIII	-4.795	Magnoliidae
HC43	DMNH-440	3.62	DMNH-22809	splay	HCIII	-4.795	Magnoliidae
HC1	DMNH-900	2.87	DMNH-7334	channel la	HCIII	-3.55	Platanites marginata
HC1	DMNH-900	2.87	DMNH-7334	channel la	HCIII	-3.55	Platanites marginata
HC103	DMNH-900	4.68	DMNH-7325	channel la	HCIII	-3.55	Trochodendroides nebrascensis
HC103	DMNH-900	4.68	DMNH-7325	channel la	HCIII	-3.55	Trochodendroides nebrascensis
HC105	DMNH-900	4	DMNH-7630	channel la	HCIII	-3.55	Marmarthia trivialis
HC105	DMNH-900	4	DMNH-7630	channel la	HCIII	-3.55	Marmarthia trivialis
HC162	DMNH-900	4.5	DMNH-7713	channel la	HCIII	-3.55	Marmarthia pearsonii
HC162	DMNH-900	4.5	DMNH-7713	channel la	HCIII	-3.55	Marmarthia pearsonii
HC2	DMNH-900	2.97	DMNH-7603	channel la	HCIII	-3.55	Grewiopsis saportana
HC2	DMNH-900	2.97	DMNH-7603	channel la	HCIII	-3.55	Grewiopsis saportana
HC261	DMNH-900	3.31	DMNH-20024	channel la	HCIII	-3.55	Rhamnaceae
HC261	DMNH-900	1.59	DMNH-19248	channel la	HCIII	-3.55	Rhamnaceae
HC261	DMNH-900	3.78	DMNH-20273	channel la	HCIII	-3.55	Rhamnaceae
HC261	DMNH-900	3.78	DMNH-20273	channel la	HCIII	-3.55	Rhamnaceae
HC261	DMNH-900	1.59	DMNH-19248	channel la	HCIII	-3.55	Rhamnaceae
HC261	DMNH-900	3.31	DMNH-20024	channel la	HCIII	-3.55	Rhamnaceae
HC4	DMNH-900	4.06	DMNH-7203	channel la	HCIII	-3.55	'Ficus' planicostata
HC4	DMNH-900	4.06	DMNH-7203	channel la	HCIII	-3.55	'Ficus' planicostata
HC4	DMNH-900	2.95	DMNH-7618	channel la	HCIII	-3.55	'Ficus' planicostata
HC4	DMNH-900	2.95	DMNH-7618	channel la	HCIII	-3.55	'Ficus' planicostata
HC62	DMNH-900	3.6	DMNH-7274	channel la	HCIII	-3.55	'Rhamnus' cleburni
HC62	DMNH-900	3.6	DMNH-7274	channel la	HCIII	-3.55	'Rhamnus' cleburni
FU7	DMNH-2103	4.15	DMNH-22352-2	carb shale	FU0	-2.265	'Populus' nebrascensis
FU7	DMNH-2103	4.62	DMNH-22352-1	carb shale	FU0	-2.265	'Populus' nebrascensis
FU16	DMNH-2212	4.82	DMNH-20029	carb splay	FU0	-1.66	Platanus raynoldsii
FU16	DMNH-2212	5.14	DMNH-22390	carb splay	FU0	-1.66	Platanus raynoldsii
FU16	DMNH-2100	4.32	DMNH-22357	carb shale	FU0	-1.66	Platanus raynoldsii
FU16	DMNH-2212	5.14	DMNH-22390	carb splay	FU0	-1.66	Platanus raynoldsii
FU16	DMNH-2100	4.32	DMNH-22357	carb shale	FU0	-1.66	Platanus raynoldsii
FU16	DMNH-2212	4.82	DMNH-20029	carb splay	FU0	-1.66	Platanus raynoldsii
FU16	DMNH-2100	4.24	DMNH-22356	carb shale	FU0	-1.66	Platanus raynoldsii
FU16	DMNH-2100	4.24	DMNH-22356	carb shale	FU0	-1.66	Platanus raynoldsii
FU43	DMNH-2212	6.34	DMNH-22401	carb splay	FU0	-1.66	Ziziphoides flabella
FU43	DMNH-2212	6.34	DMNH-22401	carb splay	FU0	-1.66	Ziziphoides flabella
FU81	DMNH-2212	5.36	DMNH-20028	carb splay	FU0	-1.66	Dicotyledones
FU81	DMNH-2212	5.36	DMNH-20028	carb splay	FU0	-1.66	Dicotyledones
FU43	DMNH-2205	4.65	DMNH-22328	carb splay	FU0	-1.43	Ziziphoides flabella
FU29	DMNH-427	5.02	DMNH-22606	pond	FUI	0.19	Dicotylophyllum anomalum
FU29	DMNH-427	5.02	DMNH-22606	pond	FUI	0.19	Dicotylophyllum anomalum
FU29	DMNH-427	4.97	DMNH-13148	pond	FUI	0.19	Dicotylophyllum anomalum
FU29	DMNH-427	4.65	DMNH-22611	pond	FUI	0.19	Dicotylophyllum anomalum
FU29	DMNH-427	4.83	DMNH-20032	pond	FUI	0.19	Dicotylophyllum anomalum
FU29	DMNH-427	4.83	DMNH-20032	pond	FUI	0.19	Dicotylophyllum anomalum
FU29	DMNH-427	4.65	DMNH-22611	pond	FUI	0.19	Dicotylophyllum anomalum
FU29	DMNH-427	5.61	DMNH-22624	pond	FUI	0.19	Dicotylophyllum anomalum
FU29	DMNH-427	5.61	DMNH-22624	pond	FUI	0.19	Dicotylophyllum anomalum
FU29	DMNH-427	4.97	DMNH-13148	pond	FUI	0.19	Dicotylophyllum anomalum
FU61	DMNH-427	4.4	DMNH-22573	pond	FUI	0.19	Penosphyllum cordatum
FU61	DMNH-427	4.4	DMNH-22573	pond	FUI	0.19	Penosphyllum cordatum
FU7	DMNH-427	7.13	DMNH-22594	pond	FUI	0.19	'Populus' nebrascensis
FU7	DMNH-427	7.13	DMNH-22594	pond	FUI	0.19	'Populus' nebrascensis
FU7	DMNH-427	6.89	DMNH-22565	pond	FUI	0.19	'Populus' nebrascensis
FU7	DMNH-427	6.89	DMNH-22565	pond	FUI	0.19	'Populus' nebrascensis
FU1	DMNH-429	5.93	DMNH-22385	pond vb	FUI	1	Paranymphaea crassifolia
FU7	DMNH-2210	6.21	DMNH-22324	pond	FUI	1.005	'Populus' nebrascensis
FU23	DMNH-2211	2.89	DMNH-22445	pond	FUI	1.055	Rosidae
FU23	DMNH-2211	2.89	DMNH-22445	pond	FUI	1.055	Rosidae
FU7	DMNH-2211	4.51	DMNH-22449	pond	FUI	1.055	'Populus' nebrascensis
FU7	DMNH-2211	4.51	DMNH-22449	pond	FUI	1.055	'Populus' nebrascensis
FU7	DMNH-2211	5.22	DMNH-22446	pond	FUI	1.055	'Populus' nebrascensis
FU7	DMNH-2211	5.22	DMNH-22446	pond	FUI	1.055	'Populus' nebrascensis
FU7	DMNH-2211	4.68	DMNH-22447	pond	FUI	1.055	'Populus' nebrascensis
FU7	DMNH-2211	4.68	DMNH-22447	pond	FUI	1.055	'Populus' nebrascensis
FU7	DMNH-2211	6.26	DMNH-22448	pond	FUI	1.055	'Populus' nebrascensis
FU7	DMNH-2211	6.26	DMNH-22448	pond	FUI	1.055	'Populus' nebrascensis
FU29	DMNH-2217	5.16	DMNH-22718	pond	FUI	1.275	Dicotylophyllum anomalum
FU29	DMNH-2217	5.16	DMNH-22718	pond	FUI	1.275	Dicotylophyllum anomalum
FU29	DMNH-2217	5.02	DMNH-22706	pond	FUI	1.275	Dicotylophyllum anomalum
FU29	DMNH-2217	5.35	DMNH-22645	pond	FUI	1.275	Dicotylophyllum anomalum
FU29	DMNH-2217	5.35	DMNH-22645	pond	FUI	1.275	Dicotylophyllum anomalum
FU29	DMNH-2217	5.02	DMNH-22706	pond	FUI	1.275	Dicotylophyllum anomalum
FU31	DMNH-2217	5.25	DMNH-20035	pond	FUI	1.275	Cornophyllum newberryi
FU31	DMNH-2217	5.25	DMNH-20035	pond	FUI	1.275	Cornophyllum newberryi
FU35	DMNH-2217	4.54	DMNH-22642	pond	FUI	1.275	Magnoliopsida
FU35	DMNH-2217	4.54	DMNH-22642	pond	FUI	1.275	Magnoliopsida
FU7	DMNH-2217	3.5	DMNH-22657	pond	FUI	1.275	'Populus' nebrascensis
FU7	DMNH-2217	3.5	DMNH-22657	pond	FUI	1.275	'Populus' nebrascensis
FU7	DMNH-2217	4.94	DMNH-22701	pond	FUI	1.275	'Populus' nebrascensis
FU7	DMNH-2217	4.65	DMNH-22702	pond	FUI	1.275	'Populus' nebrascensis
FU7	DMNH-2217	4.78	DMNH-22694	pond	FUI	1.275	'Populus' nebrascensis
FU7	DMNH-2217	4.94	DMNH-22701	pond	FUI	1.275	'Populus' nebrascensis
FU7	DMNH-2217	4.65	DMNH-22702	pond	FUI	1.275	'Populus' nebrascensis
FU7	DMNH-2217	4.78	DMNH-22694	pond	FUI	1.275	'Populus' nebrascensis
FU7	DMNH-2217	5.35	DMNH-NA1	pond	FUI	1.275	'Populus' nebrascensis
FU7	DMNH-2217	5.35	DMNH-NA1	pond	FUI	1.275	'Populus' nebrascensis
FU87	DMNH-2217	5.28	DMNH-19900	pond	FUI	1.275	Dicotyledones
FU87	DMNH-2217	5.28	DMNH-19900	pond	FUI	1.275	Dicotyledones
FU7	DMNH-2209	4.74	DMNH-22311	pond	FUI	1.61	'Populus' nebrascensis
FU7	DMNH-2209	4.29	DMNH-22511	pond	FUI	1.61	'Populus' nebrascensis
FU31	DMNH-436	4.21	DMNH-21979	aban chan	FUI	2.515	Cornophyllum newberryi
FU16	DMNH-898	6.39	DMNH-21846	pond vb	FUI	7.24	Platanus raynoldsii
FU16	DMNH-898	6.39	DMNH-21846	pond vb	FUI	7.24	Platanus raynoldsii
FU61	DMNH-898	6.06	DMNH-22120	pond vb	FUI	7.24	Penosphyllum cordatum
FU61	DMNH-898	6.06	DMNH-22120	pond vb	FUI	7.24	Penosphyllum cordatum
FU7	DMNH-898	3.85	DMNH-22191	pond vb	FUI	7.24	'Populus' nebrascensis
FU7	DMNH-898	3.85	DMNH-22191	pond vb	FUI	7.24	'Populus' nebrascensis
FU7	DMNH-898	4.95	DMNH-22151	pond vb	FUI	7.24	'Populus' nebrascensis
FU7	DMNH-898	4.95	DMNH-22151	pond vb	FUI	7.24	'Populus' nebrascensis
FU43	DMNH-441	5.13	DMNH-22002	channel la	FUI	7.405	Ziziphoides flabella
FU43	DMNH-441	5.13	DMNH-22002	channel la	FUI	7.405	Ziziphoides flabella
FU16	DMNH-562	4.62	DMNH-21912	ash bed	FUI	8.405	Platanus raynoldsii
FU43	DMNH-562	4.49	DMNH-20045A	ash bed	FUI	8.405	Ziziphoides flabella
FU5	DMNH-562	3.91	DMNH-21905	ash bed	FUI	8.405	Cercidiphyllum genetrix
FU5	DMNH-562	4.51	DMNH-20042	ash bed	FUI	8.405	Cercidiphyllum genetrix
FU1	DMNH-563	4.92	DMNH-22066	aban chan	FUI	14.405	Paranymphaea crassifolia
FU1	DMNH-563	4.92	DMNH-22066	aban chan	FUI	14.405	Paranymphaea crassifolia
FU89	DMNH-563	3.61	DMNH-22075	aban chan	FUI	14.405	Dicotyledones
FU89	DMNH-563	3.61	DMNH-22075	aban chan	FUI	14.405	Dicotyledones
FU43	DMNH-2613	3.36	DMNH-23347	carb shale	FUI	38.4	Ziziphoides flabella
FU43	DMNH-2613	3.36	DMNH-23347	carb shale	FUI	38.4	Ziziphoides flabella
