# Supplementary material for: Plant Ecological Strategies Shift Across the Cretaceous–Paleogene Boundary
Source: PLoS Biol. 2014 Sep 16;12(9):e1001949. doi: 10.1371/journal.pbio.1001949 (PMC4165584; doi:10.1371/journal.pbio.1001949)
Supplement: Data S2 — LMA data for all measured specimens. (CSV) [file pbio.1001949.s006.csv]

Specimen ID	Morphotype	Lowest taxonomic category	Stratigraphic range	Locality	Megafloral Zone	Stratigraphic depth (m)	Facies type	Petiole width (cm)	Leaf area (cm2)	Herbaceous	Leaf mass per area (g m-2)
YPM-8851	HC94	'Celastrus' taurenensis	K	KJ-88131	HCIa	-103	channel x	0.067	11.8	FALSE	57.8
DMNH-18709	HC337	Dicotyledones	K	DMNH-1851	HCIa	-80	channel la	0.207	24.94	FALSE	103.3
DMNH-18675	HC86	Leepierceia preartocarpoides	K	DMNH-1851	HCIa	-80	channel la	0.324	95.82	FALSE	87
YPM-8814	HC94	'Celastrus' taurenensis	K	KJ-88139	HCIa	-80	channel la	0.094	19.01	FALSE	62.7
DMNH-18665 (1)	HC94	'Celastrus' taurenensis	K	DMNH-1851	HCIa	-80	channel la	0.089	38.94	FALSE	45.7
DMNH-18665 (2)	HC94	'Celastrus' taurenensis	K	DMNH-1851	HCIa	-80	channel la	0.115	22.04	FALSE	69.1
DMNH-18666	HC94	'Celastrus' taurenensis	K	DMNH-1851	HCIa	-80	channel la	0.105	24.66	FALSE	61.7
DMNH-18669	HC94	'Celastrus' taurenensis	K	DMNH-1851	HCIa	-80	channel la	0.091	12.48	FALSE	71.8
DMNH-18672	HC94	'Celastrus' taurenensis	K	DMNH-1851	HCIa	-80	channel la	0.088	12.74	FALSE	69.4
DMNH-18706	HC94	'Celastrus' taurenensis	K	DMNH-1851	HCIa	-80	channel la	0.077	5.17	FALSE	88.5
DMNH-18747	FU43	Ziziphoides flabella	K-P	DMNH-1852	HCIa	-75	channel la	0.099	6.51	FALSE	98.2
DMNH-18750	FU43	Ziziphoides flabella	K-P	DMNH-1852	HCIa	-75	channel la	0.077	5.21	FALSE	88.3
YPM-7611	HC124	Cercidiphyllum	K	KJ-87112	HCIa	-75	channel la	0.091	17.82	FALSE	62.7
YPM-7193	HC124	Cercidiphyllum	K	KJ-87112	HCIa	-75	channel la	0.082	7.86	FALSE	79.2
YPM-7195	HC124	Cercidiphyllum	K	KJ-87112	HCIa	-75	channel la	0.077	6.57	FALSE	81.1
YPM-6290	HC159	Dicotyledones	K	KJ-87112	HCIa	-75	channel la	0.058	3.24	FALSE	85.7
DMNH-18736	HC212	Cercidiphyllum ellipticum	K-P	DMNH-1852	HCIa	-75	channel la	0.166	21.32	FALSE	92.4
DMNH-18737	HC212	Cercidiphyllum ellipticum	K-P	DMNH-1852	HCIa	-75	channel la	0.208	19.39	FALSE	114
YPM-8413	HC49	'Dryophyllum' subfalcatum	K	KJ-86145	HCIa	-75	aban chan	0.065	9.95	FALSE	60.3
YPM-6382	HC49	'Dryophyllum' subfalcatum	K	DMNH-430	HCIa	-75	channel la	0.096	7.82	FALSE	89.2
YPM-7146	HC49	'Dryophyllum' subfalcatum	K	DMNH-430	HCIa	-75	channel la	0.108	13.24	FALSE	79.9
YPM-7149	HC49	'Dryophyllum' subfalcatum	K	DMNH-430	HCIa	-75	channel la	0.08	15.12	FALSE	60.5
YPM-7151	HC49	'Dryophyllum' subfalcatum	K	DMNH-430	HCIa	-75	channel la	0.078	5.69	FALSE	86.2
YPM-7154	HC49	'Dryophyllum' subfalcatum	K	DMNH-430	HCIa	-75	channel la	0.075	8.59	FALSE	71.7
YPM-7157	HC49	'Dryophyllum' subfalcatum	K	DMNH-430	HCIa	-75	channel la	0.046	2.6	FALSE	78
YPM-7670	HC49	'Dryophyllum' subfalcatum	K	KJ-87112	HCIa	-75	channel la	0.087	5.48	FALSE	95.1
YPM-7674	HC49	'Dryophyllum' subfalcatum	K	KJ-87112	HCIa	-75	channel la	0.034	4.31	FALSE	50.3
YPM-6425	HC57-64	Erlingdorfia montana (lateral leaflet)	K	KJ-87101	HCIa	-75	channel la	0.149	44.11	FALSE	64.4
YPM-7181	HC73	Trochodendrales	K	DMNH-430	HCIa	-75	channel la	0.196	18.45	FALSE	111.1
DMNH-6277	HC86	Leepierceia preartocarpoides	K	DMNH-430	HCIa	-75	channel la	0.329	97.07	FALSE	87.5
DMNH-18768	HC86	Leepierceia preartocarpoides	K	DMNH-430	HCIa	-75	channel la	0.256	136.47	FALSE	63.5
YPM-8372	HC94	'Celastrus' taurenensis	K	KJ-87101	HCIa	-75	channel la	0.14	29.65	FALSE	71.7
DMNH-8467	HC106	Platanites marginata	K	DMNH-569	HCIII	-65	channel la	0.15	26.04	FALSE	79.5
DMNH-8470	HC106	Platanites marginata	K	DMNH-569	HCIII	-65	channel la	0.135	20.44	FALSE	80.2
DMNH-8472	HC106	Platanites marginata	K	DMNH-569	HCIII	-65	channel la	0.189	29.98	FALSE	90
DMNH-8476	HC106	Platanites marginata	K	DMNH-569	HCIII	-65	channel la	0.182	49.48	FALSE	72
DMNH-7647	HC106	Platanites marginata	K	DMNH-571	HCIa	-65	channel la	0.211	15.5	FALSE	125.8
DMNH-7130	HC212	Cercidiphyllum ellipticum	K-P	DMNH-571	HCIa	-65	channel la	0.237	22.72	FALSE	118.7
YPM-26401	HC49	'Dryophyllum' subfalcatum	K	DMNH-571	HCIa	-65	channel la	0.127	10.85	FALSE	97.7
DMNH-8585	HC49	'Dryophyllum' subfalcatum	K	DMNH-571	HCIa	-65	channel la	0.151	12.69	FALSE	105.1
DMNH-6262 (term)	HC57-64	Erlingdorfia montana (terminal leaflet)	K	DMNH-571	HCIa	-65	channel la	0.208	56.14	FALSE	76
DMNH-6268 (term)	HC57-64	Erlingdorfia montana (terminal leaflet)	K	DMNH-571	HCIa	-65	channel la	0.308	135.76	FALSE	73.2
DMNH-7631 (term)	HC57-64	Erlingdorfia montana (terminal leaflet)	K	DMNH-571	HCIa	-65	channel la	0.214	63.77	FALSE	74
DMNH-7635 (term)	HC57-64	Erlingdorfia montana (terminal leaflet)	K	DMNH-571	HCIa	-65	channel la	0.297	92.32	FALSE	82.5
DMNH-7639 (term)	HC57-64	Erlingdorfia montana (terminal leaflet)	K	DMNH-571	HCIa	-65	channel la	0.229	66.85	FALSE	76.5
DMNH-7641 (term)	HC57-64	Erlingdorfia montana (terminal leaflet)	K	DMNH-571	HCIa	-65	channel la	0.221	37.5	FALSE	92.9
DMNH-11002 (term)	HC57-64	Erlingdorfia montana (terminal leaflet)	K	DMNH-571	HCIa	-65	channel la	0.27	58.89	FALSE	91.1
DMNH-11007 (term)	HC57-64	Erlingdorfia montana (terminal leaflet)	K	DMNH-571	HCIa	-65	channel la	0.579	75.91	FALSE	148.1
DMNH-11017 (term)	HC57-64	Erlingdorfia montana (terminal leaflet)	K	DMNH-571	HCIa	-65	channel la	0.247	61.22	FALSE	83.9
DMNH-18829 (term)	HC57-64	Erlingdorfia montana (terminal leaflet)	K	DMNH-571	HCIa	-65	channel la	0.256	62.03	FALSE	85.8
DMNH-7644	HC57-64	Erlingdorfia montana (lateral leaflet)	K	DMNH-571	HCIa	-65	channel la	0.112	11.96	FALSE	85.5
DMNH-8591	HC57-64	Erlingdorfia montana (lateral leaflet)	K	DMNH-571	HCIa	-65	channel la	0.235	34.59	FALSE	100.4
DMNH-18865 (term)	HC57-64	Erlingdorfia montana (lateral leaflet)	K	DMNH-571	HCIa	-65	channel la	0.139	39.78	FALSE	63.7
DMNH-13006	HC57-64	Erlingdorfia montana (lateral leaflet)	K	DMNH-571	HCIa	-65	channel la	0.194	52.11	FALSE	74.2
DMNH-18830	HC57-64	Erlingdorfia montana (lateral leaflet)	K	DMNH-571	HCIa	-65	channel la	0.207	53.18	FALSE	77.3
DMNH-8552	HC63	Cissites acerifolia	K	DMNH-571	HCIa	-65	channel la	0.206	27.47	FALSE	99.2
DMNH-7524	HC66	Magnoliidae	K	DMNH-571	HCIa	-65	channel la	0.311	240.32	FALSE	59.3
DMNH-6359	HC86	Leepierceia preartocarpoides	K	DMNH-571	HCIa	-65	channel la	0.162	100.77	FALSE	50.3
DMNH-7525	HC86	Leepierceia preartocarpoides	K	DMNH-571	HCIa	-65	channel la	0.11	44.79	FALSE	50.9
DMNH-13004	HC98	Platanaceae	K	DMNH-571	HCIa	-65	channel la	0.158	88.63	FALSE	51.8
YPM-6228	HC99	Platanaceae	K	DMNH-571	HCIa	-65	channel la	0.272	153.58	FALSE	63.6
YPM-7063a	HC14	'Vitis' stantonii	K	DMNH-572	HCIa	-61.7	channel la	0.055	1.67	FALSE	105.3
YPM-7059	HC14	'Vitis' stantonii	K	DMNH-572	HCIa	-61.7	channel la	0.197	18.53	FALSE	111.3
YPM-6375	HC57-64	Erlingdorfia montana (terminal leaflet)	K	DMNH-572	HCIa	-61.7	channel la	0.178	42.66	FALSE	75
YPM-7076	HC57-64	Erlingdorfia montana (terminal leaflet)	K	DMNH-572	HCIa	-61.7	channel la	0.169	45.57	FALSE	70.1
YPM-6335	HC132	Rosidae	K	DMNH-567	HCIb	-56.8	channel la	0.062	1.73	TRUE	45.7
DMNH-18883A	HC135	Dicotyledones	K	DMNH-1491	HCIb	-56.8	channel la	0.21	34.3	FALSE	92.5
DMNH-18897	HC135	Dicotyledones	K	DMNH-1491	HCIb	-56.8	channel la	0.118	11.52	FALSE	90.2
DMNH-18912	HC135	Dicotyledones	K	DMNH-1491	HCIb	-56.8	channel la	0.106	14.74	FALSE	75.7
DMNH-18913	HC135	Dicotyledones	K	DMNH-1491	HCIb	-56.8	channel la	0.097	4.75	FALSE	109.2
DMNH-18915	HC135	Dicotyledones	K	DMNH-1491	HCIb	-56.8	channel la	0.189	17.26	FALSE	111.1
DMNH-18917	HC135	Dicotyledones	K	DMNH-1491	HCIb	-56.8	channel la	0.189	31.31	FALSE	88.3
DMNH-19035	HC135	Dicotyledones	K	DMNH-1491	HCIb	-56.8	channel la	0.103	5.47	FALSE	108.3
DMNH-19728	HC135	Dicotyledones	K	DMNH-1491	HCIb	-56.8	channel la	0.135	27.87	FALSE	71.4
DMNH-19037	HC211	Rosidae	K	DMNH-1491	HCIb	-56.8	channel la	0.056	1.24	TRUE	47
DMNH-19021	HC211	Rosidae	K	DMNH-1491	HCIb	-56.8	channel la	0.043	1.39	TRUE	40.8
DMNH-19036	HC211	Rosidae	K	DMNH-1491	HCIb	-56.8	channel la	0.045	0.77	TRUE	47.6
DMNH-19040	HC211	Rosidae	K	DMNH-1491	HCIb	-56.8	channel la	0.051	0.72	TRUE	50.9
DMNH-13222	HC212	Cercidiphyllum ellipticum	K-P	DMNH-567	HCIb	-56.8	channel la	0.194	14.22	FALSE	121.8
DMNH-19366	HC212	Cercidiphyllum ellipticum	K-P	DMNH-567	HCIb	-56.8	channel la	0.136	11.52	FALSE	100.4
DMNH-19079	HC212	Cercidiphyllum ellipticum	K-P	DMNH-1491	HCIb	-56.8	channel la	0.16	20.39	FALSE	91.5
DMNH-19075	HC212	Cercidiphyllum ellipticum	K-P	DMNH-1491	HCIb	-56.8	channel la	0.112	4.41	FALSE	125.6
DMNH-19077	HC212	Cercidiphyllum ellipticum	K-P	DMNH-1491	HCIb	-56.8	channel la	0.203	19.88	FALSE	111
DMNH-19135	HC212	Cercidiphyllum ellipticum	K-P	DMNH-2202	HCIb	-56.8	channel la	0.052	1.16	FALSE	116.5
DMNH-19085	HC216	Dicotyledones	K	DMNH-1491	HCIb	-56.8	channel la	0.043	0.19	TRUE	63.4
DMNH-19087	HC217	Dicotyledones	K	DMNH-1491	HCIb	-56.8	channel la	0.04	0.08	TRUE	73.6
DMNH-19141	HC223	Dicotyledones	K	DMNH-2202	HCIb	-56.8	channel la	0.106	5.04	FALSE	114.1
DMNH-19208	HC224	Rosidae	K	DMNH-2203	HCIb	-56.8	channel la	0.076	2.18	TRUE	47.4
DMNH-19665	HC224	Rosidae	K	DMNH-2203	HCIb	-56.8	channel la	0.117	1.68	TRUE	60.9
DMNH-19207	HC224	Rosidae	K	DMNH-2203	HCIb	-56.8	channel la	0.097	4.26	TRUE	45.7
DMNH-19202	HC228	Urticaceae	K	DMNH-2203	HCIb	-56.8	channel la	0.056	0.81	TRUE	51.7
DMNH-19204	HC229	Cercidiphyllales	K	DMNH-2203	HCIb	-56.8	channel la	0.091	8.97	FALSE	81.8
DMNH-19612	HC229	Cercidiphyllales	K	DMNH-2203	HCIb	-56.8	channel la	0.071	2.76	FALSE	105.7
DMNH-19622	HC229	Cercidiphyllales	K	DMNH-2203	HCIb	-56.8	channel la	0.109	5.65	FALSE	111.6
YPM-6201	HC80	Rosaceae	K	DMNH-567	HCIb	-56.8	channel la	0.056	4.44	FALSE	73.1
YPM-6721	HC80	Rosaceae	K	DMNH-567	HCIb	-56.8	channel la	0.065	2.58	FALSE	101.2
DMNH-13212	HC80	Rosaceae	K	DMNH-567	HCIb	-56.8	channel la	0.047	8.74	FALSE	49.7
DMNH-19148	HC80	Rosaceae	K	DMNH-567	HCIb	-56.8	channel la	0.073	6.75	FALSE	76.7
DMNH-19157	HC80	Rosaceae	K	DMNH-567	HCIb	-56.8	channel la	0.081	7.81	FALSE	78.6
YPM-6723	HC80	Rosaceae	K	DMNH-567	HCIb	-56.8	channel la	0.067	0.91	FALSE	154
YPM-6205	HC81	Cannabaceae	K	DMNH-567	HCIb	-56.8	channel la	0.047	2.72	TRUE	36.6
DMNH-19507	HC81	Cannabaceae	K	DMNH-2203	HCIb	-56.8	channel la	0.047	2.72	TRUE	36.6
DMNH-19581	HC81	Cannabaceae	K	DMNH-2203	HCIb	-56.8	channel la	0.044	2.68	TRUE	35.7
YPM-6207	HC84	Laurales	K	DMNH-567	HCIb	-56.8	channel la	0.095	7.89	FALSE	88.4
YPM-8297	HC84	Laurales	K	DMNH-567	HCIb	-56.8	channel la	0.236	8.53	FALSE	171.8
YPM-6211	HC85	Dicotyledones	K	DMNH-567	HCIb	-56.8	channel la	0.115	56.03	FALSE	48.4
YPM-8274	HC87	Laurales	K	DMNH-567	HCIb	-56.8	channel la	0.038	2.5	FALSE	68.5
YPM-8271	HC88	Chloranthaceae	K	DMNH-567	HCIb	-56.8	channel la	0.116	2.82	TRUE	54.2
YPM-8273	HC88	Chloranthaceae	K	DMNH-567	HCIb	-56.8	channel la	0.067	1.57	TRUE	48.4
YPM-6219	HC91	Dicotyledones	K	DMNH-567	HCIb	-56.8	channel la	0.151	5.37	FALSE	145.6
YPM-8227	HC92	'Cinnamomum' lineafolia	K	DMNH-567	HCIb	-56.8	channel la	0.048	1.27	FALSE	104.6
YPM-8232	HC92	'Cinnamomum' lineafolia	K	DMNH-567	HCIb	-56.8	channel la	0.084	1.38	FALSE	157
YPM-8237	HC92	'Cinnamomum' lineafolia	K	DMNH-567	HCIb	-56.8	channel la	0.083	1.33	FALSE	157.9
DMNG-19342	HC92	'Cinnamomum' lineafolia	K	DMNH-567	HCIb	-56.8	channel la	0.082	3.84	FALSE	104
DMNH-19728	HC92	'Cinnamomum' lineafolia	K	DMNH-1491	HCIb	-56.8	channel la	0.127	7.07	FALSE	115.1
DMNH-13028	HC92	'Cinnamomum' lineafolia	K	DMNH-1491	HCIb	-56.8	channel la	0.158	3.58	FALSE	176.3
DMNH-19136	HC92	'Cinnamomum' lineafolia	K	DMNH-2202	HCIb	-56.8	channel la	0.105	6.02	FALSE	105.8
DMNH-19138	HC92	'Cinnamomum' lineafolia	K	DMNH-2202	HCIb	-56.8	channel la	0.067	0.9	FALSE	155
DMNH-19458	HC92	'Cinnamomum' lineafolia	K	DMNH-2203	HCIb	-56.8	channel la	0.059	1.82	FALSE	107.7
DMNH-19054	HC94	'Celastrus' taurenensis	K	DMNH-1491	HCIb	-56.8	channel la	0.137	27.07	FALSE	73
DMNH-19134	HC94	'Celastrus' taurenensis	K	DMNH-2202	HCIb	-56.8	channel la	0.095	34.3	FALSE	50.4
YPM-6274	HC209	Platanaceae	K	Dynamite Coulee	HCIb	-55.8		0.098	6.84	FALSE	95.9
YPM-6273	HC212	Cercidiphyllum ellipticum	K-P	Dynamite Coulee	HCIb	-55.8		0.095	7.2	FALSE	91.6
YPM-6226	HC94	'Celastrus' taurenensis	K	Dynamite Coulee	HCIb	-55.8		0.112	19.96	FALSE	70.5
YPM-26493	HC94	'Celastrus' taurenensis	K	Dynamite Coulee	HCIb	-55.8		0.112	7.5	FALSE	101.9
YPM-7934	HC94	'Celastrus' taurenensis	K	KJ-86108	HCIb	-55.8	channel la	0.081	23.35	FALSE	51.8
YPM-7930	HC99	Platanaceae	K	KJ-86108	HCIb	-55.8	channel la	0.13	12.98	FALSE	92.6
YPM-6590	HC103	Trochodendroides nebrascensis	K	DMNH-2095	HCIIa	-47.8	channel la	0.209	24.95	FALSE	103.9
YPM-6251	HC122	Laurales	K	DMNH-2095	HCIIa	-47.8	channel la	0.133	9.52	FALSE	106.1
YPM-6254	HC124	Cercidiphyllum	K	DMNH-2095	HCIIa	-47.8	channel la	0.094	9.78	FALSE	80.6
DMNH-21405	HC212	Cercidiphyllum ellipticum	K-P	DMNH-897	HCIIa	-47.8	channel la	0.087	9.61	FALSE	76.4
DMNH-21420	HC212	Cercidiphyllum ellipticum	K-P	DMNH-897	HCIIa	-47.8	channel la	0.117	12.13	FALSE	88.1
DMNH-19261	HC262	Dicotyledones	K	DMNH-897	HCIIa	-47.8	channel la	0.138	42.9	FALSE	61.4
YPM-6249	HC268	Dicotyledones	K	DMNH-2095	HCIIa	-47.8	channel la	0.16	18.64	FALSE	95
DMNH-19954	HC57-64	Erlingdorfia montana (terminal leaflet)	K	DMNH-897	HCIIa	-47.8	channel la	0.26	40.14	FALSE	102.5
DMNH-21390	HC57-64	Erlingdorfia montana (terminal leaflet)	K	DMNH-897	HCIIa	-47.8	channel la	0.181	47.12	FALSE	73.1
DMNH-21393	HC57-64	Erlingdorfia montana (lateral leaflet)	K	DMNH-897	HCIIa	-47.8	channel la	0.119	5.6	FALSE	119.7
DMNH-21396	HC57-64	Erlingdorfia montana (lateral leaflet)	K	DMNH-897	HCIIa	-47.8	channel la	0.145	16.24	FALSE	92.7
YPM-6583	HC57-64	Erlingdorfia montana (lateral leaflet)	K	DMNH-2095	HCIIa	-47.8	channel la	0.12	17.83	FALSE	77.2
DMNH-21413	HC73	Trochodendrales	K	DMNH-897	HCIIa	-47.8	channel la	0.144	3.38	FALSE	167.9
YPM-6196	HC75	Dicotyledones	K	DMNH-2095	HCIIa	-47.8	channel la	0.119	23.31	FALSE	69.2
DMNH-21378	HC98	Platanaceae	K	DMNH-897	HCIIa	-47.8	channel la	0.165	55.8	FALSE	63.8
DMNH-21333	HC36	Ulmaceae	K	DMNH-2092	HCIIa	-46.9	pond	0.052	8	FALSE	55.5
DMNH-21335	HC36	Ulmaceae	K	DMNH-2092	HCIIa	-46.9	pond	0.058	6.37	FALSE	65.8
DMNH-21317	HC49	'Dryophyllum' subfalcatum	K	DMNH-2092	HCIIa	-46.9	pond	0.089	14.48	FALSE	66.7
YPM-6525	HC2	Grewiopsis saportana	K	DMNH-425	HCIIa	-45.2	channel x	0.122	29.02	FALSE	64.9
DMNH-21292	HC36	Ulmaceae	K	DMNH-425	HCIIa	-45.2	channel x	0.096	6.4	FALSE	96.6
YPM-6498	HC57-64	Erlingdorfia montana (terminal leaflet)	K	DMNH-425	HCIIa	-45.2	channel x	0.269	46.59	FALSE	99.4
YPM-6491	HC57-64	Erlingdorfia montana (terminal leaflet)	K	DMNH-425	HCIIa	-45.2	channel x	0.173	42.46	FALSE	73.4
YPM-6492	HC62	'Rhamnus' cleburni	K	DMNH-425	HCIIa	-45.2	channel x	0.153	44.09	FALSE	65.9
YPM-6508	HC73	Trochodendrales	K	DMNH-425	HCIIa	-45.2	channel x	0.126	6.88	FALSE	115.8
YPM-6509	HC86	Leepierceia preartocarpoides	K	DMNH-425	HCIIa	-45.2	channel x	0.174	48.26	FALSE	70.3
YPM-6162	HC99	Platanaceae	K	DMNH-425	HCIIa	-45.2	channel x	0.177	35.87	FALSE	79.8
YPM-6276	HC147	Dicotyledones	K	DMNH-565	HCIIa	-43.7	splay	0.142	2.22	TRUE	62.4
YPM-7831 (left)	HC49	'Dryophyllum' subfalcatum	K	DMNH-565	HCIIa	-43.7	splay	0.06	2.7	FALSE	93.2
YPM-7831 (middle)	HC49	'Dryophyllum' subfalcatum	K	DMNH-565	HCIIa	-43.7	splay	0.082	4.84	FALSE	95.3
YPM-7831 (right)	HC49	'Dryophyllum' subfalcatum	K	DMNH-565	HCIIa	-43.7	splay	0.062	6.73	FALSE	67.8
YPM-6384	HC49	'Dryophyllum' subfalcatum	K	DMNH-565	HCIIa	-43.7	splay	0.069	20.43	FALSE	48.4
YPM-6385	HC49	'Dryophyllum' subfalcatum	K	DMNH-565	HCIIa	-43.7	splay	0.059	4.37	FALSE	77.3
YPM-7907	HC49	'Dryophyllum' subfalcatum	K	DMNH-565	HCIIa	-43.7	splay	0.061	9.67	FALSE	58.4
YPM-7912	HC49	'Dryophyllum' subfalcatum	K	DMNH-565	HCIIa	-43.7	splay	0.104	19.03	FALSE	67.7
YPM-7919	HC49	'Dryophyllum' subfalcatum	K	DMNH-565	HCIIa	-43.7	splay	0.084	8.28	FALSE	78.7
YPM-7923	HC49	'Dryophyllum' subfalcatum	K	DMNH-565	HCIIa	-43.7	splay	0.073	10.25	FALSE	65.2
YPM-7926	HC49	'Dryophyllum' subfalcatum	K	DMNH-565	HCIIa	-43.7	splay	0.114	17.53	FALSE	74.8
YPM-7927	HC49	'Dryophyllum' subfalcatum	K	DMNH-565	HCIIa	-43.7	splay	0.093	9.33	FALSE	81.6
YPM-6138	HC14	'Vitis' stantonii	K	DMNH-2088	HCIIb	-38.5	channel la	0.085	56.28	FALSE	38.5
DMNH-19262	HC62	'Rhamnus' cleburni	K	DMNH-2088	HCIIb	-38.5	channel la	0.136	35.8	FALSE	65.2
YPM-6792	HC62	'Rhamnus' cleburni	K	DMNH-2088	HCIIb	-38.5	channel la	0.118	17.88	FALSE	76.5
DMNH-21226	HC135	Dicotyledones	K	DMNH-2087	HCIb	-36.9	channel la	0.104	12.57	FALSE	79.2
DMNH-19225	HC243	Cannabaceae	K	DMNH-2087	HCIb	-36.9	channel la	0.03	3.21	FALSE	51.7
DMNH-19230	HC243	Cannabaceae	K	DMNH-2087	HCIb	-36.9	channel la	0.081	6.34	FALSE	84.7
DMNH-19974	HC243	Cannabaceae	K	DMNH-2087	HCIb	-36.9	channel la	0.075	9.71	FALSE	68.4
DMNH-21258	HC243	Cannabaceae	K	DMNH-2087	HCIb	-36.9	channel la	0.073	19.71	FALSE	51.1
DMNH-19217	HC243	Cannabaceae	K	DMNH-2087	HCIb	-36.9	channel la	0.092	10.89	FALSE	76
DMNH-19221	HC246	Rosidae	K	DMNH-2087	HCIb	-36.9	channel la	0.088	12.11	FALSE	70.6
DMNH-19228	HC251	Dicotyledones	K	DMNH-2087	HCIb	-36.9	channel la	0.222	4.37	TRUE	65.4
DMNH-19228	HC251	Dicotyledones	K	DMNH-2087	HCIb	-36.9	channel la	0.191	6.51	TRUE	56.1
DMNH-19711	HC288	Rosidae	K	DMNH-2087	HCIb	-36.9	channel la	0.086	2.22	FALSE	133
DMNH-21217	HC84	Laurales	K	DMNH-2087	HCIb	-36.9	channel la	0.428	17.79	FALSE	204.7
DMNH-19727	HC291	Dicotyledones	K	KJ-9254	HCIIa	-35.2	floodplain soil	0.158	15.8	FALSE	100.1
DMNH-20704	HC291	Dicotyledones	K	DMNH-566	HCIIa	-35.2	floodplain soil	0.119	25.74	FALSE	67
DMNH-20651	HC32	Laurales?	K	DMNH-566	HCIIa	-35.2	floodplain soil	0.253	43.33	FALSE	97.5
DMNH-20687	HC57-64	Erlingdorfia montana (lateral leaflet)	K	DMNH-566	HCIIa	-35.2	floodplain soil	0.149	24.79	FALSE	80.5
DMNH-20700	HC65	Dicotyledones	K	DMNH-566	HCIIa	-35.2	floodplain soil	0.14	40.99	FALSE	63.4
DMNH-8413	HC103	Trochodendroides nebrascensis	K	DMNH-568	HCIIa	-34.6	channel x	0.14	33.62	FALSE	68.2
DMNH-8450	HC103	Trochodendroides nebrascensis	K	DMNH-568	HCIIa	-34.6	channel x	0.125	32.02	FALSE	63.8
DMNH-8451	HC103	Trochodendroides nebrascensis	K	DMNH-568	HCIIa	-34.6	channel x	0.215	48.47	FALSE	82.3
DMNH-8452	HC103	Trochodendroides nebrascensis	K	DMNH-568	HCIIa	-34.6	channel x	0.362	22.83	FALSE	163.8
DMNH-8453	HC103	Trochodendroides nebrascensis	K	DMNH-568	HCIIa	-34.6	channel x	0.112	16.39	FALSE	75.7
DMNH-8466	HC103	Trochodendroides nebrascensis	K	DMNH-568	HCIIa	-34.6	channel x	0.42	29.58	FALSE	166.2
YPM-6925	HC103	Trochodendroides nebrascensis	K	KJ-87107	HCIIa	-34.6	channel x	0.35	35.24	FALSE	135
YPM-6148	HC24	Dicotyledones	K	KJ-87107	HCIIa	-34.6	channel x	0.117	60.05	FALSE	47.8
YPM-6152	HC28	Dicotyledones	K	KJ-87107	HCIIa	-34.6	channel x	0.109	25.81	FALSE	62.6
DMNH-19232	HC282	Dicotyledones	K	KJ-9826	HCIIa	-34.6	channel x	0.209	36.64	FALSE	89.7
DMNH-8424	HC283	Laurales	K	DMNH-568	HCIIa	-34.6	channel x	0.158	28.16	FALSE	80.1
YPM-6153	HC29	Dicotyledones	K	KJ-87107	HCIIa	-34.6	channel x	0.101	42.04	FALSE	48.8
YPM-6154	HC32	Laurales?	K	KJ-87107	HCIIa	-34.6	channel x	0.2	32.11	FALSE	91.2
DMNH-8423	HC34	Dicotyledones	K	DMNH-568	HCIIa	-34.6	channel x	0.149	30.1	FALSE	74.8
DMNH-20503	HC34	Dicotyledones	K	DMNH-568	HCIIa	-34.6	channel x	0.133	28.8	FALSE	69.7
YPM-6150	HC43	Magnoliidae	K	KJ-87107	HCIIa	-34.6	channel x	0.192	62.69	FALSE	68.6
YPM-6863	HC49	'Dryophyllum' subfalcatum	K	KJ-87107	HCIIa	-34.6	channel x	0.059	2.7	FALSE	93
YPM-6865	HC49	'Dryophyllum' subfalcatum	K	KJ-87107	HCIIa	-34.6	channel x	0.081	9.32	FALSE	73.7
DMNH-6253	HC57-64	Erlingdorfia montana (terminal leaflet)	K	DMNH-568	HCIIa	-34.6	channel x	0.149	39.9	FALSE	67
DMNH-6261	HC57-64	Erlingdorfia montana (terminal leaflet)	K	DMNH-568	HCIIa	-34.6	channel x	0.248	35.09	FALSE	104.1
DMNH-20626	HC57-64	Erlingdorfia montana (terminal leaflet)	K	DMNH-568	HCIIa	-34.6	channel x	0.18	13.44	FALSE	117.5
DMNH-6253	HC57-64	Erlingdorfia montana (lateral leaflet)	K	DMNH-568	HCIIa	-34.6	channel x	0.086	19.01	FALSE	58.5
DMNH-6254	HC57-64	Erlingdorfia montana (lateral leaflet)	K	DMNH-568	HCIIa	-34.6	channel x	0.182	32.64	FALSE	84.5
DMNH-8409	HC57-64	Erlingdorfia montana (lateral leaflet)	K	DMNH-568	HCIIa	-34.6	channel x	0.118	14.19	FALSE	83.4
DMNH-8464	HC57-64	Erlingdorfia montana (lateral leaflet)	K	DMNH-568	HCIIa	-34.6	channel x	0.084	8.13	FALSE	79.6
DMNH-19233	HC60	Araliaephyllum polevoi	K	DMNH-568	HCIIa	-34.6	channel x	0.325	89.06	FALSE	89.7
DMNH-8461	HC60	Araliaephyllum polevoi	K	DMNH-568	HCIIa	-34.6	channel x	0.543	148.46	FALSE	109.1
YPM-6184	HC62	'Rhamnus' cleburni	K	KJ-87107	HCIIa	-34.6	channel x	0.095	10.7	FALSE	79
YPM-6895	HC62	'Rhamnus' cleburni	K	KJ-87107	HCIIa	-34.6	channel x	0.062	4.67	FALSE	77.5
YPM-6897	HC62	'Rhamnus' cleburni	K	KJ-87107	HCIIa	-34.6	channel x	0.078	15.7	FALSE	58.5
YPM-6901	HC62	'Rhamnus' cleburni	K	KJ-87107	HCIIa	-34.6	channel x	0.097	11.34	FALSE	78.2
DMNH-20483	HC62	'Rhamnus' cleburni	K	DMNH-568	HCIIa	-34.6	channel x	0.234	35.99	FALSE	98.6
YPM-6185	HC63	Cissites acerifolia	K	DMNH-568	HCIIa	-34.6	channel x	0.368	67.39	FALSE	109.7
DMNH-8458	HC63	Cissites acerifolia	K	DMNH-568	HCIIa	-34.6	channel x	0.181	117.12	FALSE	51.7
[missing]	HC66	Magnoliidae	K	DMNH-568	HCIIa	-34.6	channel x	0.149	48.22	FALSE	62.4
DMNH-8411	HC66	Magnoliidae	K	DMNH-568	HCIIa	-34.6	channel x	0.142	71.52	FALSE	51.8
DMNH-8414	HC66	Magnoliidae	K	DMNH-568	HCIIa	-34.6	channel x	0.215	46.38	FALSE	83.9
DMNH-8432	HC66	Magnoliidae	K	DMNH-568	HCIIa	-34.6	channel x	0.139	16.77	FALSE	88.7
DMNH-20477	HC66	Magnoliidae	K	DMNH-568	HCIIa	-34.6	channel x	0.126	71.8	FALSE	47.2
YPM-7601	HC66	Magnoliidae	K	KJ-87107	HCIIa	-34.6	channel x	0.183	69.2	FALSE	63.7
YPM-6189	HC67	Dicotyledones	K	DMNH-568	HCIIa	-34.6	channel x	0.085	2.58	FALSE	124.7
DMNH-19976	HC103	Trochodendroides nebrascensis	K	DMNH-1489	HCIIa	-33.7	channel la	0.182	16.62	FALSE	109.2
DMNH-19977	HC254	Dicotyledones	K	DMNH-1489	HCIIa	-33.7	channel la	0.163	23.28	FALSE	88.3
DMNH-20606	HC254	Dicotyledones	K	DMNH-1489	HCIIa	-33.7	channel la	0.33	19.22	FALSE	163.1
DMNH-20535	HC268	Dicotyledones	K	DMNH-1489	HCIIa	-33.7	channel la	0.113	15.09	FALSE	78.9
DMNH-20536	HC268	Dicotyledones	K	DMNH-1489	HCIIa	-33.7	channel la	0.141	14.62	FALSE	94.5
DMNH-20539	HC268	Dicotyledones	K	DMNH-1489	HCIIa	-33.7	channel la	0.112	17.5	FALSE	74
DMNH-20541	HC268	Dicotyledones	K	DMNH-1489	HCIIa	-33.7	channel la	0.073	11.74	FALSE	62.4
DMNH-19723	HC273	Dicotyledones	K	DMNH-1489	HCIIa	-33.7	channel la	0.155	14.59	FALSE	101.4
DMNH-19709	HC274	Dicotyledones	K	DMNH-1489	HCIIa	-33.7	channel la	0.078	11.92	FALSE	64.9
DMNH-19708	HC281	Dicotyledones	K	DMNH-1489	HCIIa	-33.7	channel la	0.118	31.6	FALSE	61.4
DMNH-19978	HC285	Dicotyledones	K	DMNH-1489	HCIIa	-33.7	channel la	0.343	42.21	FALSE	124.4
DMNH-20566	HC291	Dicotyledones	K	DMNH-1489	HCIIa	-33.7	channel la	0.201	25.83	FALSE	99.6
DMNH-20549	HC49	'Dryophyllum' subfalcatum	K	DMNH-1489	HCIIa	-33.7	channel la	0.123	11.91	FALSE	92
DMNH-20553	HC49	'Dryophyllum' subfalcatum	K	DMNH-1489	HCIIa	-33.7	channel la	0.135	10.18	FALSE	104.9
DMNH-20565	HC57-64	Erlingdorfia montana (terminal leaflet)	K	DMNH-1489	HCIIa	-33.7	channel la	0.124	13.23	FALSE	88.9
DMNH-20578	HC57-64	Erlingdorfia montana (terminal leaflet)	K	DMNH-1489	HCIIa	-33.7	channel la	0.165	16.36	FALSE	102
DMNH-20568	HC65	Dicotyledones	K	DMNH-1489	HCIIa	-33.7	channel la	0.12	20.21	FALSE	73.8
DMNH-20576	HC65	Dicotyledones	K	DMNH-1489	HCIIa	-33.7	channel la	0.149	46.76	FALSE	63.2
DMNH-20545	HC86	Leepierceia preartocarpoides	K	DMNH-1489	HCIIa	-33.7	channel la	0.1	54.67	FALSE	43.9
YPM-6145	HC21	Dicotyledones	K	DMNH-2096	HCIIa	-33.2	floodplain soil	0.085	6.46	FALSE	87.3
DMNH-19249	HC290	Dicotyledones	K	KJ-9853	HCIIa	-31.4	channel la	0.129	17.89	FALSE	81.6
DMNH-21003	HC290	Dicotyledones	K	DMNH-2097	HCIIa	-31.4	channel la	0.172	12.49	FALSE	116.6
DMNH-20997	HC49	'Dryophyllum' subfalcatum	K	DMNH-2097	HCIIa	-31.4	channel la	0.184	34.65	FALSE	83.2
DMNH-20974	HC62	'Rhamnus' cleburni	K	DMNH-2097	HCIIa	-31.4	channel la	0.123	28.95	FALSE	65.5
DMNH-20975	HC62	'Rhamnus' cleburni	K	DMNH-2097	HCIIa	-31.4	channel la	0.141	34.22	FALSE	68.2
DMNH-21000	HC62	'Rhamnus' cleburni	K	DMNH-2097	HCIIa	-31.4	channel la	0.11	19.22	FALSE	70.4
DMNH-20952	HC66	Magnoliidae	K	DMNH-2097	HCIIa	-31.4	channel la	0.246	92.79	FALSE	71.3
YPM-6079	HC140	Platanaceae	K-P	DMNH-431	HCIIa	-30.7	channel la	0.133	8.61	FALSE	110.4
DMNH-19768	HC303	Dicotyledones	K	DMNH-431	HCIIa	-30.7	channel la	0.102	14.09	FALSE	74.7
DMNH-6264	HC57-64	Erlingdorfia montana (terminal leaflet)	K	DMNH-431	HCIIa	-30.7	channel la	0.15	24.69	FALSE	81
DMNH-6265 (1)	HC57-64	Erlingdorfia montana (terminal leaflet)	K	DMNH-431	HCIIa	-30.7	channel la	0.321	21.74	FALSE	152.2
DMNH-6265 (2)	HC57-64	Erlingdorfia montana (terminal leaflet)	K	DMNH-431	HCIIa	-30.7	channel la	0.22	18.85	FALSE	120.4
DMNH-6267	HC57-64	Erlingdorfia montana (terminal leaflet)	K	DMNH-431	HCIIa	-30.7	channel la	0.18	32.43	FALSE	84
YPM-6170	HC49	'Dryophyllum' subfalcatum	K	DMNH-2215	HCIIa	-26.5	channel la	0.072	7.3	FALSE	73.8
YPM-8762	HC49	'Dryophyllum' subfalcatum	K	DMNH-2215	HCIIa	-26.5	channel la	0.116	16.79	FALSE	77
YPM-6171	HC52	Platanoids	K	DMNH-2215	HCIIa	-26.5	channel la	0.128	19.75	FALSE	78.4
YPM-8767	HC52	Platanoids	K	DMNH-2215	HCIIa	-26.5	channel la	0.091	8.11	FALSE	84.7
YPM-6174	HC55	Dicotyledones	K	DMNH-2215	HCIIa	-26.5	channel la	0.034	1.4	TRUE	36.8
YPM-6176	HC56	Dicotyledones	K	DMNH-2215	HCIIa	-26.5	channel la	0.1	29.18	FALSE	55.6
YPM-8977	HC14	'Vitis' stantonii	K	DMNH-908	HCIIb	-24.8	aban chan	0.073	21.86	FALSE	48.8
DMNH-20407	HC105	Marmarthia trivialis	K	DMNH-1781	HCIII	-23.4	channel la	0.274	21.84	FALSE	134.4
DMNH-20867	HC162	Marmarthia pearsonii	K	DMNH-1781	HCIII	-23.4	channel la	0.24	18.09	FALSE	130.7
DMNH-16694	HC200	Bisonia niemii	K	DMNH-1781	HCIII	-23.4	channel la	0.334	116.4	FALSE	82.6
DMNH-19254	HC254	Dicotyledones	K	DMNH-1781	HCIII	-23.4	channel la	0.119	27.77	FALSE	64.9
DMNH-19720	HC286	Dicotyledones	K	DMNH-1781	HCIII	-23.4	channel la	0.115	13.94	FALSE	82.2
DMNH-19880	HC338	Dicotyledones	K	DMNH-1781	HCIII	-23.4	channel la	0.182	14.7	FALSE	114.3
DMNH-21807	HC14	'Vitis' stantonii	K	DMNH-1855	HCIII	-20.8	channel la	0.123	13.64	FALSE	87.4
DMNH-19236	HC249	Dicotyledones	K	DMNH-1855	HCIII	-20.8	channel la	0.38	113.11	FALSE	92.2
DMNH-19237	HC250	Dicotyledones	K	DMNH-1855	HCIII	-20.8	channel la	0.169	26.1	FALSE	86.9
DMNH-20003	HC254	Dicotyledones	K	DMNH-1855	HCIII	-20.8	channel la	0.197	15.26	FALSE	120
DMNH-21786(1)	HC254	Dicotyledones	K	DMNH-1855	HCIII	-20.8	channel la	0.2	10.87	FALSE	138
DMNH-21786(2)	HC254	Dicotyledones	K	DMNH-1855	HCIII	-20.8	channel la	0.168	13.05	FALSE	112.5
DMNH-21786(3)	HC254	Dicotyledones	K	DMNH-1855	HCIII	-20.8	channel la	0.093	9.76	FALSE	80.4
DMNH-21813	HC254	Dicotyledones	K	DMNH-1855	HCIII	-20.8	channel la	0.131	13.48	FALSE	92.1
DMNH-19235	HC255	Dicotyledones	K	DMNH-1855	HCIII	-20.8	channel la	0.111	17.51	FALSE	73.3
DMNH-21799	HC49	'Dryophyllum' subfalcatum	K	DMNH-1855	HCIII	-20.8	channel la	0.115	5.68	FALSE	116
YPM-9118	HC103	Trochodendroides nebrascensis	K	KJ-88125		-19		0.192	17.27	FALSE	112.2
DMNH-20762	HC162	Marmarthia pearsonii	K	DMNH-1250	HCIII	-18.7	channel la	0.259	15.49	FALSE	147
DMNH-20758	HC52	Platanoids	K	DMNH-1250	HCIII	-18.7	channel la	0.104	15.26	FALSE	73.6
YPM-8620	HC105	Marmarthia trivialis	K	KJ-87147a	HCIII	-17.9	channel x	0.062	4.78	FALSE	77.3
YPM-8907	HC1	Platanites marginata (lateral leaflet)	K	DMNH-2099	HCIII	-17.1	channel la	0.119	12.22	FALSE	88.8
DMNH-21767	HC105	Marmarthia trivialis	K	DMNH-2099	HCIII	-17.1	channel la	0.208	14.39	FALSE	127.9
DMNH-21736	HC111	Paranymphaea hastata	K	DMNH-2099	HCIII	-17.1	channel la	0.202	29.61	FALSE	94.9
DMNH-21738	HC111	Paranymphaea hastata	K	DMNH-2099	HCIII	-17.1	channel la	0.093	10.15	FALSE	79.2
DMNH-21746	HC111	Paranymphaea hastata	K	DMNH-2099	HCIII	-17.1	channel la	0.106	15.18	FALSE	74.8
YPM-8904	HC28	Dicotyledones	K	DMNH-2099	HCIII	-17.1	channel la	0.23	67.05	FALSE	76.8
DMNH-21715	HC315	Dicotyledones	K	DMNH-2099	HCIII	-17.1	channel la	0.064	18.07	FALSE	47.9
DMNH-21754	HC57-64	Erlingdorfia montana (terminal leaflet)	K	DMNH-2099	HCIII	-17.1	channel la	0.528	44.91	FALSE	168.7
DMNH-21778	HC62	'Rhamnus' cleburni	K	DMNH-2099	HCIII	-17.1	channel la	0.135	11.03	FALSE	101.8
YPM-6168	HC99	Platanaceae	K	KJ-86158	HCIII	-16.8	channel x	0.236	25.39	FALSE	113.3
YPM-6350	HC14	'Vitis' stantonii	K	DMNH-910	HCIIb	-16.4	channel la	0.223	49.36	FALSE	84.1
YPM-6351	HC14	'Vitis' stantonii	K	DMNH-910	HCIIb	-16.4	channel la	0.134	44.7	FALSE	59.3
YPM-8951	HC14	'Vitis' stantonii	K	DMNH-910	HCIIb	-16.4	channel la	0.2	25.76	FALSE	99.2
DMNH-6227	HC1	Platanites marginata (lateral leaflet)	K	DMNH-517	HCIII	-16.2	channel la	0.153	19.15	FALSE	90.7
DMNH-6232	HC106	Platanites marginata	K	DMNH-517	HCIII	-16.2	channel la	0.204	26.93	FALSE	99
DMNH-6235	HC106	Platanites marginata	K	DMNH-517	HCIII	-16.2	channel la	0.242	39.2	FALSE	98
DMNH-6236	HC106	Platanites marginata	K	DMNH-517	HCIII	-16.2	channel la	0.34	52.05	FALSE	113.9
DMNH-20787	HC43	Magnoliidae	K	DMNH-517	HCIII	-16.2	channel la	0.211	30.24	FALSE	97.4
DMNH-6190	HC105	Marmarthia trivialis	K	DMNH-428	HCIII	-15	channel x	0.196	41.38	FALSE	81.5
DMNH-7573	HC105	Marmarthia trivialis	K	DMNH-428	HCIII	-15	channel x	0.144	30.77	FALSE	72.4
DMNH-13601	HC105	Marmarthia trivialis	K	DMNH-428	HCIII	-15	channel x	0.192	32.87	FALSE	87.7
DMNH-13602	HC105	Marmarthia trivialis	K	DMNH-428	HCIII	-15	channel x	0.314	34.45	FALSE	125.4
DMNH-13611	HC105	Marmarthia trivialis	K	DMNH-428	HCIII	-15	channel x	0.158	15.16	FALSE	101.7
DMNH-20159	HC105	Marmarthia trivialis	K	DMNH-428	HCIII	-15	channel x	0.17	58.35	FALSE	64.1
DMNH-20160	HC105	Marmarthia trivialis	K	DMNH-428	HCIII	-15	channel x	0.142	20.41	FALSE	83.7
DMNH-20077	HC111	Paranymphaea hastata	K	DMNH-428	HCIII	-15	channel x	0.247	17.49	FALSE	135.5
DMNH-20083	HC111	Paranymphaea hastata	K	DMNH-428	HCIII	-15	channel x	0.155	29.39	FALSE	77.9
DMNH-13659	HC162	Marmarthia pearsonii	K	DMNH-428	HCIII	-15	channel x	0.322	25.45	FALSE	143.5
DMNH-20168	HC162	Marmarthia pearsonii	K	DMNH-428	HCIII	-15	channel x	0.15	17.11	FALSE	93.2
YPM-8865	HC162	Marmarthia pearsonii	K	DMNH-428	HCIII	-15	channel x	0.177	14.21	FALSE	113.7
DMNH-6899	HC166	Liriodendrites bradacii	K	DMNH-428	HCIII	-15	channel x	0.168	42.51	FALSE	71.8
DMNH-7697	HC166	Liriodendrites bradacii	K	DMNH-428	HCIII	-15	channel x	0.214	72.31	FALSE	70.5
DMNH-7707	HC166	Liriodendrites bradacii	K	DMNH-428	HCIII	-15	channel x	0.249	61.55	FALSE	84.3
DMNH-13529	HC166	Liriodendrites bradacii	K	DMNH-428	HCIII	-15	channel x	0.154	29.35	FALSE	77.4
DMNH-13534	HC166	Liriodendrites bradacii	K	DMNH-428	HCIII	-15	channel x	0.108	48.41	FALSE	48.9
DMNH-19893	HC169	Dicotyledones	K	DMNH-428	HCIII	-15	channel x	0.16	36.85	FALSE	72.9
DMNH-7400	HC169	Dicotyledones	K	DMNH-428	HCIII	-15	channel x	0.103	43.17	FALSE	49.1
DMNH-7463	HC174	'Ziziphus' fibrillosus	K	DMNH-428	HCIII	-15	channel x	0.153	28.21	FALSE	78.1
DMNH-13650	HC179	'Artocarpus' lessigiana	K	DMNH-428	HCIII	-15	channel x	0.243	60.67	FALSE	83.2
DMNH-20219	HC179	'Artocarpus' lessigiana	K	DMNH-428	HCIII	-15	channel x	0.408	68.75	FALSE	117.7
DMNH-6240	HC180	Cissites puilosokensis	K	DMNH-428	HCIII	-15	channel x	0.239	92.68	FALSE	69.8
YPM-6314	HC182	Dicotyledones	K	DMNH-428	HCIII	-15	channel x	0.216	44.88	FALSE	85.2
DMNH-6845	HC199	Laurales	K	DMNH-428	HCIII	-15	channel x	0.187	33.63	FALSE	85.3
DMNH-7465	HC199	Laurales	K	DMNH-428	HCIII	-15	channel x	0.284	17.85	FALSE	149.2
DMNH-13630	HC199	Laurales	K	DMNH-428	HCIII	-15	channel x	0.319	56.32	FALSE	105.2
DMNH-13632	HC199	Laurales	K	DMNH-428	HCIII	-15	channel x	0.198	62.99	FALSE	70
DMNH-20211	HC199	Laurales	K	DMNH-428	HCIII	-15	channel x	0.151	27.27	FALSE	78.3
DMNH-6722	HC2	Grewiopsis saportana	K	DMNH-428	HCIII	-15	channel x	0.131	32.04	FALSE	66.2
DMNH-6927	HC200	Bisonia niemii	K	DMNH-428	HCIII	-15	channel x	0.272	47.39	FALSE	99.5
DMNH-6863	HC207	Dicotyledones	K	DMNH-428	HCIII	-15	channel x	0.199	88.48	FALSE	61.7
DMNH-7587	HC212	Cercidiphyllum ellipticum	K-P	DMNH-428	HCIII	-15	channel x	0.267	15.9	FALSE	148.8
DMNH-7397	HC261	Rhamnaceae	K	DMNH-428	HCIII	-15	channel x	0.188	52.56	FALSE	72.3
DMNH-7474	HC261	Rhamnaceae	K	DMNH-428	HCIII	-15	channel x	0.279	60.55	FALSE	92.4
DMNH-6926	HC280	Dicotyledones	K	DMNH-428	HCIII	-15	channel x	0.236	73.75	FALSE	75.5
DMNH-7401	HC280	Dicotyledones	K	DMNH-428	HCIII	-15	channel x	0.248	64.7	FALSE	82.3
DMNH-13542	HC293	Dicotyledones	K	DMNH-428	HCIII	-15	channel x	0.128	48.54	FALSE	55.5
DMNH-13541	HC295	Dicotyledones	K	DMNH-428	HCIII	-15	channel x	0.2	48	FALSE	78.4
DMNH-6721	HC321	Dicotyledones	K	DMNH-428	HCIII	-15	channel x	0.127	21.64	FALSE	75
DMNH-6827	HC321	Dicotyledones	K	DMNH-428	HCIII	-15	channel x	0.227	17.33	FALSE	127.2
DMNH-19883	HC343	Dicotyledones	K	DMNH-428	HCIII	-15	channel x	0.23	63.22	FALSE	78.5
DMNH-20279	HC343	Dicotyledones	K	DMNH-428	HCIII	-15	channel x	0.162	31.25	FALSE	78.6
DMNH-7556	HC347	Dicotyledones	K	DMNH-428	HCIII	-15	channel x	0.17	33.05	FALSE	79.8
DMNH-7405	HC349	Dicotyledones	K	DMNH-428	HCIII	-15	channel x	0.106	18.29	FALSE	69.8
DMNH-19889	HC359	Dicotyledones	K	DMNH-428	HCIII	-15	channel x	0.157	22.59	FALSE	87
YPM-8868	HC4	'Ficus' planicostata	K	DMNH-428	HCIII	-15	channel x	0.236	14.34	FALSE	141.1
DMNH-13590	HC4	'Ficus' planicostata	K	DMNH-428	HCIII	-15	channel x	0.182	63.39	FALSE	65.5
DMNH-13592	HC4	'Ficus' planicostata	K	DMNH-428	HCIII	-15	channel x	0.132	46.35	FALSE	57.8
YPM-8870	HC4	'Ficus' planicostata	K	DMNH-428	HCIII	-15	channel x	0.305	68.12	FALSE	94.7
YPM-9130	HC4	'Ficus' planicostata	K	KJ-88104	HCIII	-15	channel x	0.262	86.57	FALSE	76.8
DMNH-13536	HC62	'Rhamnus' cleburni	K	DMNH-428	HCIII	-15	channel x	0.197	51.35	FALSE	75.5
YPM-9116	HC162	Marmarthia pearsonii	K	DMNH-574	HCIII	-11.5	channel la	0.2	19.05	FALSE	111.5
YPM-9112	HC2	Grewiopsis saportana	K	DMNH-574	HCIII	-11.5	channel la	0.145	12.34	FALSE	102.7
DMNH-21566	HC265	Laurales	K	DMNH-574	HCIII	-11.5	channel la	0.218	25.1	FALSE	107.2
DMNH-21559	HC4	'Ficus' planicostata	K	DMNH-574	HCIII	-11.5	channel la	0.193	23.76	FALSE	99.7
DMNH-21560	HC4	'Ficus' planicostata	K	DMNH-574	HCIII	-11.5	channel la	0.183	43.83	FALSE	75.8
DMNH-21581	HC106	Platanites marginata	K	DMNH-1782	HCIII	-11.1	channel x	0.133	16.11	FALSE	87.2
DMNH-21588	HC162	Marmarthia pearsonii	K	DMNH-1782	HCIII	-11.1	channel x	0.228	14.78	FALSE	135.7
DMNH-21687	HC162	Marmarthia pearsonii	K	DMNH-2094	HCIII	-10.6	channel la	0.53	29.98	FALSE	197.5
DMNH-21691	HC321	Dicotyledones	K	DMNH-2094	HCIII	-10.6	channel la	0.064	3.15	FALSE	93.2
DMNH-19722	HC285	Dicotyledones	K	DMNH-2091	HCIII	-10.1	floodplain soil	0.078	25.76	FALSE	48.3
YPM-6438	HC111	Paranymphaea hastata	K	KJ-87152	HCIII	-9.5	channel x	0.088	18.78	FALSE	59.9
DMNH-21653	HC162	Marmarthia pearsonii	K	DMNH-2093	HCIII	-9.5	channel x	0.178	11.84	FALSE	122.2
DMNH-21662	HC57-64	Erlingdorfia montana (terminal leaflet)	K	DMNH-2093	HCIII	-9.5	channel x	0.166	20.98	FALSE	93.2
YPM-6125	HC1	Platanites marginata (lateral leaflet)	K	KJ-87110	HCIII	-8.5	splay	0.089	7.54	FALSE	85.9
YPM-8568	HC1	Platanites marginata (lateral leaflet)	K	KJ-87110	HCIII	-8.5	splay	0.19	17.05	FALSE	111.7
YPM-6376	HC105	Marmarthia trivialis	K	KJ-87110	HCIII	-8.5	splay	0.257	36.51	FALSE	105.5
YPM-8550	HC105	Marmarthia trivialis	K	KJ-87110	HCIII	-8.5	splay	0.25	28.39	FALSE	113.5
YPM-6126	HC2	Grewiopsis saportana	K	KJ-87110	HCIII	-8.5	splay	0.145	49.75	FALSE	60.5
YPM-8586	HC3	Dicotyledones	K	KJ-87110	HCIII	-8.5	splay	0.133	12.11	FALSE	97.3
DMNH-21551	HC1	Platanites marginata (lateral leaflet)	K	DMNH-439	HCIII	-7.9	channel la	0.117	7.38	FALSE	106.3
YPM-9083	HC1	Platanites marginata (lateral leaflet)	K	KJ-88130		-7.7		0.123	7.1	FALSE	111.9
YPM-6348	HC105	Marmarthia trivialis	K	KJ-88130		-7.7		0.11	25.83	FALSE	62.9
YPM-6299	HC168	Laurales	K	KJ-88130		-7.7		0.162	58.85	FALSE	61.8
YPM-9079	HC28	Dicotyledones	K	KJ-88130		-7.7		0.191	60.01	FALSE	69.3
YPM-6353	HC4	'Ficus' planicostata	K	KJ-88130		-7.7		0.169	46.53	FALSE	69.8
YPM-9062	HC43	Magnoliidae	K	KJ-88130		-7.7		0.138	21.28	FALSE	80.4
YPM-6357	HC44	'Dryophyllum' tenneseensis	K	KJ-88130		-7.7		0.062	6.78	FALSE	67.6
DMNH-21545	HC106	Platanites marginata	K	DMNH-1854	HCIII	-6.2	splay	0.278	49.23	FALSE	99.7
DMNH-21467	HC2	Grewiopsis saportana	K	DMNH-2098	HCIII	-6	pond	0.152	24.43	FALSE	82.2
DMNH-21468	HC2	Grewiopsis saportana	K	DMNH-2098	HCIII	-6	pond	0.116	30.8	FALSE	61.2
DMNH-19251	HC279	Dicotyledones	K	DMNH-2098	HCIII	-6	pond	0.205	42	FALSE	84.1
DMNH-20018	HC36	Ulmaceae	K	DMNH-2098	HCIII	-6	pond	0.076	8.83	FALSE	71.4
DMNH-20397	FU16	Platanus raynoldsii	K-P	DMNH-900	HCIII	-3.6	channel la	0.083	13.57	FALSE	64.8
DMNH-20367	FU61	Penosphyllum cordatum	K-P	DMNH-900	HCIII	-3.6	channel la	0.159	23.2	FALSE	86.8
DMNH-20396	HC1	Platanites marginata (lateral leaflet)	K	DMNH-900	HCIII	-3.6	channel la	0.064	7.64	FALSE	66.2
DMNH-7322	HC105	Marmarthia trivialis	K	DMNH-900	HCIII	-3.6	channel la	0.301	25.92	FALSE	135.3
DMNH-7630	HC105	Marmarthia trivialis	K	DMNH-900	HCIII	-3.6	channel la	0.171	23.34	FALSE	91.6
DMNH-7334	HC106	Platanites marginata	K	DMNH-900	HCIII	-3.6	channel la	0.42	138.95	FALSE	92
DMNH-8717	HC111	Paranymphaea hastata	K	DMNH-900	HCIII	-3.6	channel la	0.127	10.21	FALSE	99.9
DMNH-7713	HC162	Marmarthia pearsonii	K	DMNH-900	HCIII	-3.6	channel la	0.152	18.25	FALSE	91.9
DMNH-8700	HC162	Marmarthia pearsonii	K	DMNH-900	HCIII	-3.6	channel la	0.258	36.88	FALSE	105.2
DMNH-9713	HC162	Marmarthia pearsonii	K	DMNH-900	HCIII	-3.6	channel la	0.2	20.62	FALSE	108
DMNH-7831	HC162	Marmarthia pearsonii	K	DMNH-900	HCIII	-3.6	channel la	0.296	33.23	FALSE	121.6
DMNH-7195	HC2	Grewiopsis saportana	K	DMNH-900	HCIII	-3.6	channel la	0.168	44.17	FALSE	70.8
DMNH-7221	HC2	Grewiopsis saportana	K	DMNH-900	HCIII	-3.6	channel la	0.142	47.32	FALSE	60.6
DMNH-7272	HC2	Grewiopsis saportana	K	DMNH-900	HCIII	-3.6	channel la	0.074	11.55	FALSE	63.2
DMNH-7275	HC2	Grewiopsis saportana	K	DMNH-900	HCIII	-3.6	channel la	0.105	27.99	FALSE	58.8
DMNH-7826	HC2	Grewiopsis saportana	K	DMNH-900	HCIII	-3.6	channel la	0.149	50.81	FALSE	61.2
DMNH-20359	HC2	Grewiopsis saportana	K	DMNH-900	HCIII	-3.6	channel la	0.141	40.03	FALSE	64.3
DMNH-18863	HC208	Liriodendron	K	DMNH-900	HCIII	-3.6	channel la	0.2	97.89	FALSE	59.6
DMNH-8721	HC208	Liriodendron	K	DMNH-900	HCIII	-3.6	channel la	0.113	82.62	FALSE	41.2
DMNH-19248	HC261	Rhamnaceae	K	KJ-9531	HCIII	-3.6	channel la	0.153	38.36	FALSE	69.4
DMNH-19240	HC263	Dicotyledones	K	KJ-9531	HCIII	-3.6	channel la	0.196	28.25	FALSE	94.6
DMNH-7169	HC263	Dicotyledones	K	DMNH-900	HCIII	-3.6	channel la	0.165	30.37	FALSE	80.4
DMNH-19244	HC264	Dicotyledones	K	DMNH-900	HCIII	-3.6	channel la	0.351	59.21	FALSE	111.1
DMNH-7204	HC264	Dicotyledones	K	DMNH-900	HCIII	-3.6	channel la	0.37	37.66	FALSE	137.4
DMNH-20384	HC264	Dicotyledones	K	DMNH-900	HCIII	-3.6	channel la	0.37	17.82	FALSE	182.9
DMNH-7151	HC265	Laurales	K	DMNH-900	HCIII	-3.6	channel la	0.282	27.7	FALSE	125.6
DMNH-7152	HC265	Laurales	K	DMNH-900	HCIII	-3.6	channel la	0.137	8.71	FALSE	112.8
DMNH-7258	HC265	Laurales	K	DMNH-900	HCIII	-3.6	channel la	0.306	22.03	FALSE	146
DMNH-7311	HC265	Laurales	K	DMNH-900	HCIII	-3.6	channel la	0.252	13.6	FALSE	151.4
DMNH-8712	HC265	Laurales	K	DMNH-900	HCIII	-3.6	channel la	0.286	26.48	FALSE	129.1
DMNH-19243	HC280	Dicotyledones	K	DMNH-900	HCIII	-3.6	channel la	0.395	161.14	FALSE	83
DMNH-20365	HC329	Platanaceae	K	DMNH-900	HCIII	-3.6	channel la	0.139	20.82	FALSE	81.6
DMNH-7271 & 7277	HC330	Platanaceae	K	DMNH-900	HCIII	-3.6	channel la	0.202	30.2	FALSE	94.4
DMNH-7715	HC333	Dicotyledones	K	DMNH-900	HCIII	-3.6	channel la	0.06	25.69	FALSE	39.7
DMNH-7185	HC335	Dicotyledones	K	DMNH-900	HCIII	-3.6	channel la	0.095	17.53	FALSE	65.3
DMNH-8701	HC336	Dicotyledones	K	DMNH-900	HCIII	-3.6	channel la	0.097	9.24	FALSE	84.5
DMNH-7605	HC4	'Ficus' planicostata	K	DMNH-900	HCIII	-3.6	channel la	0.272	20.88	FALSE	136.2
DMNH-7234	HC43	Magnoliidae	K	DMNH-900	HCIII	-3.6	channel la	0.153	29.99	FALSE	76.2
DMNH-7173	HC43	Magnoliidae	K	DMNH-900	HCIII	-3.6	channel la	0.196	9.89	FALSE	141.1
DMNH-20360	HC49	'Dryophyllum' subfalcatum	K	DMNH-900	HCIII	-3.6	channel la	0.088	5.93	FALSE	93
DMNH-7149	HC57-64	Erlingdorfia montana (terminal leaflet)	K	DMNH-900	HCIII	-3.6	channel la	0.197	30.63	FALSE	91.9
DMNH-7244	HC62	'Rhamnus' cleburni	K	DMNH-900	HCIII	-3.6	channel la	0.214	25.11	FALSE	105.6
DMNH-7274	HC62	'Rhamnus' cleburni	K	DMNH-900	HCIII	-3.6	channel la	0.095	15.69	FALSE	68
DMNH-7279	HC62	'Rhamnus' cleburni	K	DMNH-900	HCIII	-3.6	channel la	0.129	15.83	FALSE	85.6
DMNH-7335	HC62	'Rhamnus' cleburni	K	DMNH-900	HCIII	-3.6	channel la	0.079	13.97	FALSE	61.7
DMNH-22388	FU16	Platanus raynoldsii	K-P	DMNH-2212	FU0	-1.7	carb splay	0.072	19.45	FALSE	50.7
DMNH-22406	FU29	Dicotylophyllum anomalum	K-P	DMNH-2212	FU0	-1.7	carb splay	0.128	27	FALSE	69.4
DMNH-22424	FU43	Ziziphoides flabella	K-P	DMNH-2212	FU0	-1.7	carb splay	0.093	15.78	FALSE	66.7
DMNH-19735	FU81	Dicotyledones	K-P	DMNH-2212	FU0	-1.7	carb splay	0.1	16.17	FALSE	69.8
DMNH-22394	FU81	Dicotyledones	K-P	DMNH-2212	FU0	-1.7	carb splay	0.144	17.57	FALSE	89.5
YPM-9624	FU1	Paranymphaea crassifolia	P	KJ-86162	FUI	0	pond	0.242	56.09	FALSE	85.4
YPM-9801B	FU29	Dicotylophyllum anomalum	K-P	DMNH-427	FUI	0.2	pond	0.181	26.91	FALSE	90.5
DMNH-22610	FU29	Dicotylophyllum anomalum	K-P	DMNH-427	FUI	0.2	pond	0.16	63.6	FALSE	59.3
DMNH-22624	FU29	Dicotylophyllum anomalum	K-P	DMNH-427	FUI	0.2	pond	0.114	16.53	FALSE	76.6
YPM-9837	FU29	Dicotylophyllum anomalum	K-P	DMNH-427	FUI	0.2	pond	0.168	24.01	FALSE	89.5
YPM-6080	FU35	Dicotyledones	K-P	DMNH-427	FUI	0.2	pond	0.107	7.6	FALSE	97.9
DMNH-22571	FU61	Penosphyllum cordatum	K-P	DMNH-427	FUI	0.2	pond	0.315	104.2	FALSE	82.4
YPM-6108	FU63	Platanaceae	K-P	DMNH-427	FUI	0.2	pond	0.066	3.33	FALSE	93
DMNH-13143	FU63	Platanaceae	K-P	DMNH-427	FUI	0.2	pond	0.055	11.1	FALSE	51.1
YPM-6109	FU64	Dicotyledones	P	DMNH-427	FUI	0.2	pond	0.052	1.37	FALSE	108.3
YPM-10740	FU65	Dicotyledones	P	DMNH-427	FUI	0.2	pond vb	0.116	12.96	FALSE	85.3
YPM-10744	FU65	Dicotyledones	P	DMNH-427	FUI	0.2	pond vb	0.128	18.09	FALSE	80.7
YPM-6114	FU69	Dicotyledones	P	DMNH-427	FUI	0.2	pond vb	0.22	2.78	TRUE	72
YPM-9757	FU7	'Populus' nebrascensis	K-P	DMNH-427	FUI	0.2	pond	0.066	10.07	FALSE	61.2
DMNH-22575	FU7	'Populus' nebrascensis	K-P	DMNH-427	FUI	0.2	pond	0.105	19.46	FALSE	67.6
DMNH-22589	FU7	'Populus' nebrascensis	K-P	DMNH-427	FUI	0.2	pond	0.129	18.84	FALSE	80.1
DMNH-22361	FU29	Dicotylophyllum anomalum	K-P	DMNH-429	FUI	1	pond vb	0.22	29.71	FALSE	101.2
DMNH-22380 (1)	FU31	Cornophyllum newberryi	K-P	DMNH-429	FUI	1	pond vb	0.112	22.33	FALSE	67.4
DMNH-22380 (2)	FU31	Cornophyllum newberryi	K-P	DMNH-429	FUI	1	pond vb	0.165	20.52	FALSE	93.6
DMNH-22706	FU29	Dicotylophyllum anomalum	K-P	DMNH-2217	FUI	1.3	pond	0.174	27.64	FALSE	87
DMNH-22652	FU29	Dicotylophyllum anomalum	K-P	DMNH-2217	FUI	1.3	pond	0.135	38.88	FALSE	62.9
DMNH-22707	FU29	Dicotylophyllum anomalum	K-P	DMNH-2217	FUI	1.3	pond	0.114	21.36	FALSE	69.5
DMNH-22710	FU29	Dicotylophyllum anomalum	K-P	DMNH-2217	FUI	1.3	pond	0.187	33.57	FALSE	85.3
DMNH-22637	FU35	Dicotyledones	K-P	DMNH-2217	FUI	1.3	pond	0.081	17.64	FALSE	57.6
DMNH-22640	FU35	Dicotyledones	K-P	DMNH-2217	FUI	1.3	pond	0.142	36.44	FALSE	67
DMNH-22646	FU35	Dicotyledones	K-P	DMNH-2217	FUI	1.3	pond	0.133	7.73	FALSE	115.2
DMNH-20037	FU7	'Populus' nebrascensis	K-P	DMNH-2217	FUI	1.3	pond	0.237	27.43	FALSE	110.4
DMNH-22693	FU7	'Populus' nebrascensis	K-P	DMNH-2217	FUI	1.3	pond	0.13	14.69	FALSE	88.6
DMNH-22697	FU7	'Populus' nebrascensis	K-P	DMNH-2217	FUI	1.3	pond	0.172	26.6	FALSE	87.5
DMNH-22512	FU31	Cornophyllum newberryi	K-P	DMNH-2206	FUI	2	pond vb	0.113	12.68	FALSE	84.2
DMNH-22512	FU7	'Populus' nebrascensis	K-P	DMNH-2206	FUI	2	pond vb	0.159	35.95	FALSE	73.4
YPM-9722	FU31	Cornophyllum newberryi	K-P	KJ-86149	FUI	2.3	pond ls	0.172	34.87	FALSE	78.8
YPM-68214	FU31	Cornophyllum newberryi	K-P	KJ-86149	FUI	2.3	pond ls	0.169	48.32	FALSE	68.7
YPM-9727	FU31	Cornophyllum newberryi	K-P	KJ-86149	FUI	2.3	pond ls	0.122	27.86	FALSE	66.1
YPM-9730	FU31	Cornophyllum newberryi	K-P	KJ-86149	FUI	2.3	pond ls	0.194	29.74	FALSE	91.9
YPM-9731	FU31	Cornophyllum newberryi	K-P	KJ-86149	FUI	2.3	pond ls	0.152	35.59	FALSE	71.3
YPM-9734	FU31	Cornophyllum newberryi	K-P	KJ-86149	FUI	2.3	pond ls	0.084	15.48	FALSE	62.3
YPM-9715	FU7	'Populus' nebrascensis	K-P	KJ-86149	FUI	2.3	pond ls	0.157	15.76	FALSE	99.8
YPM-68209	FU7	'Populus' nebrascensis	K-P	KJ-86149	FUI	2.3	pond ls	0.11	15.49	FALSE	76.6
DMNH-22531	FU1	Paranymphaea crassifolia	P	DMNH-1858	FUI	2.4	channel la	0.382	190.59	FALSE	75.9
DMNH-22542	FU31	Cornophyllum newberryi	K-P	DMNH-1858	FUI	2.4	channel la	0.117	12.59	FALSE	86.7
DMNH-22525	FU7	'Populus' nebrascensis	K-P	DMNH-1858	FUI	2.4	channel la	0.164	35.05	FALSE	75.9
DMNH-22528	FU7	'Populus' nebrascensis	K-P	DMNH-1858	FUI	2.4	channel la	0.192	25.02	FALSE	97.4
DMNH-21935	FU29	Dicotylophyllum anomalum	K-P	DMNH-436	FUI	2.5	aban chan	0.151	60.86	FALSE	57.8
DMNH-21945	FU29	Dicotylophyllum anomalum	K-P	DMNH-436	FUI	2.5	aban chan	0.216	71.92	FALSE	71.1
DMNH-21973	FU29	Dicotylophyllum anomalum	K-P	DMNH-436	FUI	2.5	aban chan	0.191	38.5	FALSE	82.1
DMNH-21937	FU29	Dicotylophyllum anomalum	K-P	DMNH-436	FUI	2.5	aban chan	0.261	62.57	FALSE	86.8
DMNH-21941 (1)	FU29	Dicotylophyllum anomalum	K-P	DMNH-436	FUI	2.5	aban chan	0.079	26.57	FALSE	48.3
DMNH-21941 (2)	FU29	Dicotylophyllum anomalum	K-P	DMNH-436	FUI	2.5	aban chan	0.178	52.66	FALSE	69.2
DMNH-21968	FU29	Dicotylophyllum anomalum	K-P	DMNH-436	FUI	2.5	aban chan	0.099	19.1	FALSE	65.1
DMNH-21988 (1)	FU29	Dicotylophyllum anomalum	K-P	DMNH-436	FUI	2.5	aban chan	0.229	69	FALSE	75.6
DMNH-21988 (2)	FU29	Dicotylophyllum anomalum	K-P	DMNH-436	FUI	2.5	aban chan	0.225	83.64	FALSE	69.3
DMNH-21989	FU29	Dicotylophyllum anomalum	K-P	DMNH-436	FUI	2.5	aban chan	0.2	63.13	FALSE	70.5
DMNH-21990 (1)	FU29	Dicotylophyllum anomalum	K-P	DMNH-436	FUI	2.5	aban chan	0.147	25.53	FALSE	78.8
DMNH-21990 (2)	FU29	Dicotylophyllum anomalum	K-P	DMNH-436	FUI	2.5	aban chan	0.153	24.86	FALSE	82.1
DMNH-21960	FU31	Cornophyllum newberryi	K-P	DMNH-436	FUI	2.5	aban chan	0.097	35.81	FALSE	50.3
DMNH-21956	FU31	Cornophyllum newberryi	K-P	DMNH-436	FUI	2.5	aban chan	0.229	35.83	FALSE	97.1
DMNH-21957	FU31	Cornophyllum newberryi	K-P	DMNH-436	FUI	2.5	aban chan	0.144	43.48	FALSE	63.3
DMNH-21965	FU31	Cornophyllum newberryi	K-P	DMNH-436	FUI	2.5	aban chan	0.092	27.84	FALSE	53.3
DMNH-21932	FU61	Penosphyllum cordatum	K-P	DMNH-436	FUI	2.5	aban chan	0.185	98.24	FALSE	56.1
DMNH-21933	FU7	'Populus' nebrascensis	K-P	DMNH-436	FUI	2.5	aban chan	0.111	28.23	FALSE	61.2
YPM-9671	FU49	Flacourticeae	P	KJ-87150	FUI	3.9	carb shale	0.204	36.52	FALSE	88.1
YPM-6097	FU52	Dicotyledones	P	KJ-87150	FUI	3.9	carb shale	0.075	11.11	FALSE	64.8
YPM-66448	FU7	'Populus' nebrascensis	K-P	KJ-87150	FUI	3.9	carb shale	0.106	10.26	FALSE	87.2
DMNH-21839	FU7	'Populus' nebrascensis	K-P	DMNH-902	FUI	6.8	pond vb	0.159	17.13	FALSE	97.4
DMNH-21846	FU16	Platanus raynoldsii	K-P	DMNH-898	FUI	7.2	pond vb	0.121	37.68	FALSE	58.6
DMNH-21853	FU16	Platanus raynoldsii	K-P	DMNH-898	FUI	7.2	pond vb	0.176	25.91	FALSE	89.9
DMNH-21850	FU16	Platanus raynoldsii	K-P	DMNH-898	FUI	7.2	pond vb	0.184	42.8	FALSE	76.9
DMNH-21851	FU16	Platanus raynoldsii	K-P	DMNH-898	FUI	7.2	pond vb	0.196	45.1	FALSE	79
DMNH-21852	FU16	Platanus raynoldsii	K-P	DMNH-898	FUI	7.2	pond vb	0.101	35.64	FALSE	52.2
DMNH-20052	FU61	Penosphyllum cordatum	K-P	DMNH-898	FUI	7.2	pond vb	0.153	51.66	FALSE	62.2
DMNH-22109	FU61	Penosphyllum cordatum	K-P	DMNH-898	FUI	7.2	pond vb	0.058	29.76	FALSE	36.5
DMNH-22052	FU61	Penosphyllum cordatum	K-P	DMNH-898	FUI	7.2	pond vb	0.161	52.2	FALSE	64.3
DMNH-22125	FU7	'Populus' nebrascensis	K-P	DMNH-898	FUI	7.2	pond vb	0.138	35.37	FALSE	66.3
DMNH-22082	FU7	'Populus' nebrascensis	K-P	DMNH-898	FUI	7.2	pond vb	0.049	2.96	FALSE	77.5
DMNH-22094	FU7	'Populus' nebrascensis	K-P	DMNH-898	FUI	7.2	pond vb	0.065	3.43	FALSE	91
DMNH-22132	FU7	'Populus' nebrascensis	K-P	DMNH-898	FUI	7.2	pond vb	0.185	22.32	FALSE	98.9
DMNH-22134	FU7	'Populus' nebrascensis	K-P	DMNH-898	FUI	7.2	pond vb	0.2	53.02	FALSE	75.4
DMNH-22135	FU7	'Populus' nebrascensis	K-P	DMNH-898	FUI	7.2	pond vb	0.116	7.08	FALSE	107.3
DMNH-22147	FU7	'Populus' nebrascensis	K-P	DMNH-898	FUI	7.2	pond vb	0.194	39.91	FALSE	82.1
DMNH-22126	FU7	'Populus' nebrascensis	K-P	DMNH-898	FUI	7.2	pond vb	0.071	11.64	FALSE	61.3
DMNH-22128	FU7	'Populus' nebrascensis	K-P	DMNH-898	FUI	7.2	pond vb	0.102	33.97	FALSE	53.3
DMNH-22129	FU7	'Populus' nebrascensis	K-P	DMNH-898	FUI	7.2	pond vb	0.07	7.44	FALSE	71.5
DMNH-22130	FU7	'Populus' nebrascensis	K-P	DMNH-898	FUI	7.2	pond vb	0.076	10.36	FALSE	67.1
DMNH-22136	FU7	'Populus' nebrascensis	K-P	DMNH-898	FUI	7.2	pond vb	0.198	27.67	FALSE	96
DMNH-22140	FU7	'Populus' nebrascensis	K-P	DMNH-898	FUI	7.2	pond vb	0.078	13.18	FALSE	62.7
DMNH-22141	FU7	'Populus' nebrascensis	K-P	DMNH-898	FUI	7.2	pond vb	0.117	18.25	FALSE	75.3
DMNH-22142	FU7	'Populus' nebrascensis	K-P	DMNH-898	FUI	7.2	pond vb	0.131	24.59	FALSE	73.1
DMNH-22146	FU7	'Populus' nebrascensis	K-P	DMNH-898	FUI	7.2	pond vb	0.178	16.47	FALSE	107.6
DMNH-22149	FU7	'Populus' nebrascensis	K-P	DMNH-898	FUI	7.2	pond vb	0.083	12.62	FALSE	66.9
DMNH-22156	FU7	'Populus' nebrascensis	K-P	DMNH-898	FUI	7.2	pond vb	0.068	20.26	FALSE	48
DMNH-22165	FU7	'Populus' nebrascensis	K-P	DMNH-898	FUI	7.2	pond vb	0.155	26.71	FALSE	80.8
DMNH-22167	FU7	'Populus' nebrascensis	K-P	DMNH-898	FUI	7.2	pond vb	0.086	9.74	FALSE	75.7
DMNH-22171	FU7	'Populus' nebrascensis	K-P	DMNH-898	FUI	7.2	pond vb	0.103	24.5	FALSE	60.8
DMNH-22175	FU7	'Populus' nebrascensis	K-P	DMNH-898	FUI	7.2	pond vb	0.107	18.07	FALSE	70.7
DMNH-22178	FU7	'Populus' nebrascensis	K-P	DMNH-898	FUI	7.2	pond vb	0.143	10.71	FALSE	107.8
DMNH-7849	FU16	Platanus raynoldsii	K-P	DMNH-441	FUI	7.4	channel la	0.265	383.15	FALSE	43.9
YPM-6427A	FU43	Ziziphoides flabella	K-P	DMNH-441	FUI	7.4	channel la	0.133	24.92	FALSE	73.7
DMNH-22007	FU43	Ziziphoides flabella	K-P	DMNH-441	FUI	7.4	channel la	0.115	15.66	FALSE	78.7
DMNH-22031	FU43	Ziziphoides flabella	K-P	DMNH-441	FUI	7.4	channel la	0.178	17.71	FALSE	104.9
DMNH-22011	FU7	'Populus' nebrascensis	K-P	DMNH-441	FUI	7.4	channel la	0.167	22.97	FALSE	90.3
DMNH-22024	FU7	'Populus' nebrascensis	K-P	DMNH-441	FUI	7.4	channel la	0.23	28.51	FALSE	106.3
YPM-9236A	FU77	Dicotyledones	P	DMNH-441	FUI	7.4	channel la	0.284	45.91	FALSE	104.1
DMNH-20041	FU16	Platanus raynoldsii	K-P	DMNH-562	FUI	8.4	ash bed	0.12	19.41	FALSE	75.2
DMNH-21862	FU31	Cornophyllum newberryi	K-P	DMNH-562	FUI	8.4	ash bed	0.11	7.44	FALSE	101.2
DMNH-20045	FU43	Ziziphoides flabella	K-P	DMNH-562	FUI	8.4	ash bed	0.096	5.34	FALSE	103.8
DMNH-20043	FU43	Ziziphoides flabella	K-P	DMNH-562	FUI	8.4	ash bed	0.051	9	FALSE	52.3
DMNH-21859	FU43	Ziziphoides flabella	K-P	DMNH-562	FUI	8.4	ash bed	0.065	2.49	FALSE	102.9
DMNH-21868	FU43	Ziziphoides flabella	K-P	DMNH-562	FUI	8.4	ash bed	0.115	16.8	FALSE	76.6
DMNH-21877	FU43	Ziziphoides flabella	K-P	DMNH-562	FUI	8.4	ash bed	0.054	8.35	FALSE	56.2
DMNH-21898	FU43	Ziziphoides flabella	K-P	DMNH-562	FUI	8.4	ash bed	0.068	5.56	FALSE	78.3
DMNH-21867	FU43	Ziziphoides flabella	K-P	DMNH-562	FUI	8.4	ash bed	0.09	4.99	FALSE	100.7
DMNH-21869	FU43	Ziziphoides flabella	K-P	DMNH-562	FUI	8.4	ash bed	0.078	3.91	FALSE	99.7
DMNH-21870	FU43	Ziziphoides flabella	K-P	DMNH-562	FUI	8.4	ash bed	0.081	18.12	FALSE	56.9
DMNH-21872	FU43	Ziziphoides flabella	K-P	DMNH-562	FUI	8.4	ash bed	0.136	23.91	FALSE	76.3
DMNH-21874	FU43	Ziziphoides flabella	K-P	DMNH-562	FUI	8.4	ash bed	0.108	25.53	FALSE	62.3
DMNH-21902	FU5	Cercidiphyllum genetrix	K-P	DMNH-562	FUI	8.4	ash bed	0.067	7.7	FALSE	68.6
DMNH-21901	FU5	Cercidiphyllum genetrix	K-P	DMNH-562	FUI	8.4	aban chan	0.061	7.27	FALSE	65
DMNH-21904	FU5	Cercidiphyllum genetrix	K-P	DMNH-562	FUI	8.4	ash bed	0.122	7.41	FALSE	109.4
DMNH-21905	FU5	Cercidiphyllum genetrix	K-P	DMNH-562	FUI	8.4	ash bed	0.07	13.05	FALSE	57.7
DMNH-21886	FU7	'Populus' nebrascensis	K-P	DMNH-562	FUI	8.4	ash bed	0.098	7.22	FALSE	93.9
DMNH-21888	FU7	'Populus' nebrascensis	K-P	DMNH-562	FUI	8.4	ash bed	0.09	12.41	FALSE	71.4
DMNH-21889	FU7	'Populus' nebrascensis	K-P	DMNH-562	FUI	8.4	ash bed	0.062	6.65	FALSE	68.2
DMNH-21890	FU7	'Populus' nebrascensis	K-P	DMNH-562	FUI	8.4	ash bed	0.12	15.12	FALSE	82.3
DMNH-19733	FU1	Paranymphaea crassifolia	P	DMNH-563	FUI	14.4	aban chan	0.169	24.24	FALSE	89.5
DMNH-22066	FU1	Paranymphaea crassifolia	P	DMNH-563	FUI	14.4	aban chan	0.73	564.67	FALSE	82.2
DMNH-22016	FU31	Cornophyllum newberryi	K-P	DMNH-563	FUI	14.4	aban chan	0.124	10.97	FALSE	95.4
DMNH-22057	FU31	Cornophyllum newberryi	K-P	DMNH-563	FUI	14.4	aban chan	0.118	24.66	FALSE	67.4
DMNH-22061	FU31	Cornophyllum newberryi	K-P	DMNH-563	FUI	14.4	aban chan	0.125	10.99	FALSE	96.1
DMNH-22059	FU31	Cornophyllum newberryi	K-P	DMNH-563	FUI	14.4	aban chan	0.116	28.5	FALSE	62.9
DMNH-22062	FU31	Cornophyllum newberryi	K-P	DMNH-563	FUI	14.4	aban chan	0.196	16.65	FALSE	115.5
DMNH-22027	FU43	Ziziphoides flabella	K-P	DMNH-563	FUI	14.4	aban chan	0.089	25.97	FALSE	53.4
DMNH-22048	FU1	Paranymphaea crassifolia	P	DMNH-905	FUI	14.5	pond	0.311	187.4	FALSE	65.3
YPM-9211	FU25	Magnoliales	K-P	KJ-88103G	FUI	18	splay	0.14	11.65	FALSE	102.7
YPM-9204	FU29	Dicotylophyllum anomalum	K-P	KJ-88103G	FUI	18	splay	0.104	48.39	FALSE	47.3
YPM-6121	FU75	Dicotyledones	P	KJ-88103i	FUI	28.8	pond vb	0.108	10.94	FALSE	86.3
YPM-9162	FU75	Dicotyledones	P	KJ-88103i	FUI	28.8	pond vb	0.152	18.6	FALSE	91.1
DMNH-22276	FU7	'Populus' nebrascensis	K-P	DMNH-1848	FUI	29.3	pond	0.154	49.83	FALSE	63.2
YPM-9574	FU29	Dicotylophyllum anomalum	K-P	KJ-86113	FUI	30	pond ls	0.113	27.14	FALSE	63.1
YPM-9577	FU29	Dicotylophyllum anomalum	K-P	KJ-86113	FUI	30	pond ls	0.151	35.69	FALSE	70.9
YPM-9579	FU29	Dicotylophyllum anomalum	K-P	KJ-86113	FUI	30	pond ls	0.161	34.38	FALSE	75.2
YPM-9581	FU29	Dicotylophyllum anomalum	K-P	KJ-86113	FUI	30	pond ls	0.108	52.16	FALSE	47.5
YPM-9583	FU29	Dicotylophyllum anomalum	K-P	KJ-86113	FUI	30	pond ls	0.149	23.37	FALSE	82.5
YPM-9577	FU43	Ziziphoides flabella	K-P	KJ-86113	FUI	30	pond ls	0.076	7.11	FALSE	77.7
YPM-9568	FU5	Cercidiphyllum genetrix	K-P	KJ-86113	FUI	30	pond ls	0.172	59.75	FALSE	64.3
YPM-9569	FU5	Cercidiphyllum genetrix	K-P	KJ-86113	FUI	30	pond ls	0.198	37.3	FALSE	85.6
YPM-9573	FU5	Cercidiphyllum genetrix	K-P	KJ-86113	FUI	30	pond ls	0.057	17.95	FALSE	43.5
DMNH-22225	FU29	Dicotylophyllum anomalum	K-P	DMNH-2201	FUI	37.4	pond	0.211	39.54	FALSE	87.9
DMNH-22230	FU29	Dicotylophyllum anomalum	K-P	DMNH-2201	FUI	37.4	pond	0.159	26.2	FALSE	82.8
YPM-6392	FU14	Dicotyledones	P	KJ-86110	FUI	50	splay	0.083	14.67	FALSE	62.7
YPM-6393	FU15	Dicotyledones	P	KJ-86110	FUI	50	splay	0.074	3.74	FALSE	97.3
YPM-6394	FU16	Platanus raynoldsii	K-P	KJ-86110	FUI	50	splay	0.149	67.47	FALSE	54.9
YPM-9419	FU19	Pinnate Dilleniidae	P	KJ-86110	FUI	50	splay	0.14	70.1	FALSE	51.6
YPM-6069	FU20	Dicotyledones	P	KJ-86110	FUI	50	splay	0.097	30.14	FALSE	53.9
YPM-9466	FU29	Dicotylophyllum anomalum	K-P	KJ-86110	FUI	50	splay	0.181	39.63	FALSE	78.2
YPM-9994	FU29	Dicotylophyllum anomalum	K-P	KJ-86110	FUI	50	splay	0.22	22.11	FALSE	113.3
YPM-6088	FU43	Ziziphoides flabella	K-P	KJ-86110	FUI	50	splay	0.105	10.69	FALSE	85.2
YPM-6415	FU43	Ziziphoides flabella	K-P	KJ-86110	FUI	50	splay	0.087	15.74	FALSE	63.5
YPM-6416	FU43	Ziziphoides flabella	K-P	KJ-86110	FUI	50	splay	0.149	25.76	FALSE	79.1
YPM-6420	FU43	Ziziphoides flabella	K-P	KJ-86110	FUI	50	splay	0.086	10.13	FALSE	74.7
YPM-9373	FU43	Ziziphoides flabella	K-P	KJ-86110	FUI	50	splay	0.08	5.06	FALSE	92.1
YPM-9378	FU43	Ziziphoides flabella	K-P	KJ-86110	FUI	50	splay	0.066	8.08	FALSE	66.4
YPM-9380	FU43	Ziziphoides flabella	K-P	KJ-86110	FUI	50	splay	0.175	22.39	FALSE	94.7
YPM-9389	FU43	Ziziphoides flabella	K-P	KJ-86110	FUI	50	splay	0.082	7.32	FALSE	81.1
YPM-9391	FU43	Ziziphoides flabella	K-P	KJ-86110	FUI	50	splay	0.062	3.1	FALSE	90.7
YPM-9396	FU43	Ziziphoides flabella	K-P	KJ-86110	FUI	50	splay	0.056	2.26	FALSE	95
YPM-9403	FU5	Cercidiphyllum genetrix	K-P	KJ-86110	FUI	50	splay	0.106	32.01	FALSE	56.4
YPM-9407	FU5	Cercidiphyllum genetrix	K-P	KJ-86110	FUI	50	splay	0.105	6.07	FALSE	105.4
YPM-9411	FU5	Cercidiphyllum genetrix	K-P	KJ-86110	FUI	50	splay	0.119	12.63	FALSE	87.9
YPM-6058	FU7	'Populus' nebrascensis	K-P	KJ-86110	FUI	50	splay	0.204	31.86	FALSE	92.9
YPM-9413	FU7	'Populus' nebrascensis	K-P	KJ-86110	FUI	50	splay	0.021	2.22	FALSE	45.3
YPM-9409	FU7	'Populus' nebrascensis	K-P	KJ-86110	FUI	50	splay	0.056	4.93	FALSE	70.6
YPM-9415	FU7	'Populus' nebrascensis	K-P	KJ-86110	FUI	50	splay	0.146	27.08	FALSE	76.7
YPM-9416	FU7	'Populus' nebrascensis	K-P	KJ-86110	FUI	50	splay	0.167	15	FALSE	106.3
YPM-6074	FU25	Magnoliales	K-P	L-8408	FUI	80	carb shale	0.138	13.42	FALSE	96.1
