# Supplementary material for: Plant Ecological Strategies Shift Across the Cretaceous–Paleogene Boundary
Source: PLoS Biol. 2014 Sep 16;12(9):e1001949. doi: 10.1371/journal.pbio.1001949 (PMC4165584; doi:10.1371/journal.pbio.1001949)
Supplement: Data S3 — Temporally binned VD and LMA values, paired with proxy temperature values. (CSV) [file pbio.1001949.s007.csv]

Stratigraphic depth (m)	Number of species in bin	LMA (low estimate, g m-2)	LMA (mean estimate, g m-2)	LMA (high estimate, g m-2)	Vein density (low estimate, mm-1)	Vein density (mean estimate, mm-1)	Vein density (high estimate, mm-1)	Temperature index (Wilf et al., low estimate, degC)	Temperature index (Wilf et al., mean estimate, degC)	Temperature index (Wilf et al., high estimate, degC)
-88	1	72.39	72.39	76.19	2.97	2.97	2.97	8.9	11.9	14.9
-80	1	80.17	80.17	86	2.9	2.9	2.9	8.9	11.9	14.9
-75	3	71.78	80.89	94.34	2.47	2.86	3.06	8.9	11.9	14.9
-65	5	83.84	85.26	87.02	2.67	2.71	2.74	8.53	11.55	14.57
-62	3	90.42	90.42	90.42	3.45	3.45	3.45	8.6	11.45	14.3
-57	14	73.59	85.39	95.01	3.3	3.54	3.69	7.63	9.95	12.27
-50	1	84.55	89.38	99.86	3.58	3.58	3.58	6.65	9.5	12.35
-48	3	88.67	91.3	102.74	2.83	2.83	2.83	7.5	10.35	13.2
-47	2	63.67	63.67	63.67	3.4	3.4	3.4	7.85	10.7	13.55
-42	3	64.46	65.32	65.75	3.86	3.94	4.04	7.2	10.05	12.9
-38	1	57.5	60.07	61.35	3.69	3.69	3.69	7.1	9.95	12.8
-37	11	96.33	102.44	96.33	3.97	3.97	3.97	8.18	10.8	13.42
-35	3	74.93	81.83	82.28	2.83	3.01	3.13	11.08	13.95	16.82
-34	5	89.2	89.2	93.63	2.84	3.42	3.88	11.65	14.5	17.35
-33	2	87.3	87.3	87.3	3.29	3.33	3.36	11.63	14.45	17.27
-31	8	84.78	89.4	92.05	3.02	3.02	3.04	11.7	14.55	17.4
-26	1	62.34	62.34	62.34	4.77	4.77	4.77	11.5	14.35	17.2
-25	1	48.8	48.8	48.8	3.13	3.13	3.13	11.45	14.3	17.15
-23	6	84.04	101.52	115.5	3.53	3.53	3.53	13.1	15.95	18.8
-21	8	94.07	94.07	94.07	3.15	3.39	3.17	12.85	15.7	18.55
-19	4	110.3	110.93	111.25	4.59	4.59	4.59	12.5	15.35	18.2
-17	3	100.09	101.02	105.85	3.54	3.54	3.54	12.18	15.25	18.32
-16	5	93.15	93.15	97.24	3.13	3.13	3.13	11.83	14.9	17.97
-15	11	83.98	86.04	83.98	3.61	3.61	3.61	14.18	16.45	18.72
-12	1	97.47	102.29	107.1	2.64	2.64	2.64	12.8	15.65	18.5
-11	4	111.45	128.4	145.35	4.35	4.35	4.65	12.23	15.35	18.47
-10	1	57	80.9	107.7	3.23	3.23	3.23	12.03	15.15	18.27
-6	3	71.55	81.73	88	2.93	2.93	2.93	12.45	15.3	18.15
-5	1	80.54	85.32	88.76	3.62	3.62	3.62	11.98	15.1	18.22
-4	8	89.52	88.92	89.52	3.63	3.63	3.63	11.45	14.4	17.35
-2	4	66.61	66.61	66.61	4.39	5.07	5.56	6	8.85	11.7
-1	1	67.72	73.56	75.6	4.65	4.65	4.65	6.37	9.3	12.23
0	3	68.83	80.51	84.58	5.47	5.47	5.47	7.99	11.1	14.21
1	7	83.87	86.66	90.85	4.98	5.01	4.98	7.53	10.55	13.57
2	1	63.67	74.81	81.89	4.52	4.52	4.52	5.9	8.75	11.6
3	1	71.85	77.42	80.96	4.21	4.21	4.21	5.75	8.6	11.45
7	4	67.64	79.12	88.9	5.49	5.49	5.61	7.27	10.11	12.96
8	3	81.85	81.85	81.85	4.44	4.44	4.44	7.45	10.3	13.15
14	2	73	73	75.57	4.27	4.27	4.27	7.45	10.3	13.15
38	1	84.43	84.43	84.43	3.36	3.36	3.36	7.45	10.3	13.15
