# Supplementary material for: Plant Ecological Strategies Shift Across the Cretaceous–Paleogene Boundary
Source: PubMed Central journal article supplement (PMC4165584; doi:10.1371/journal.pbio.1001949), 2014-09-16

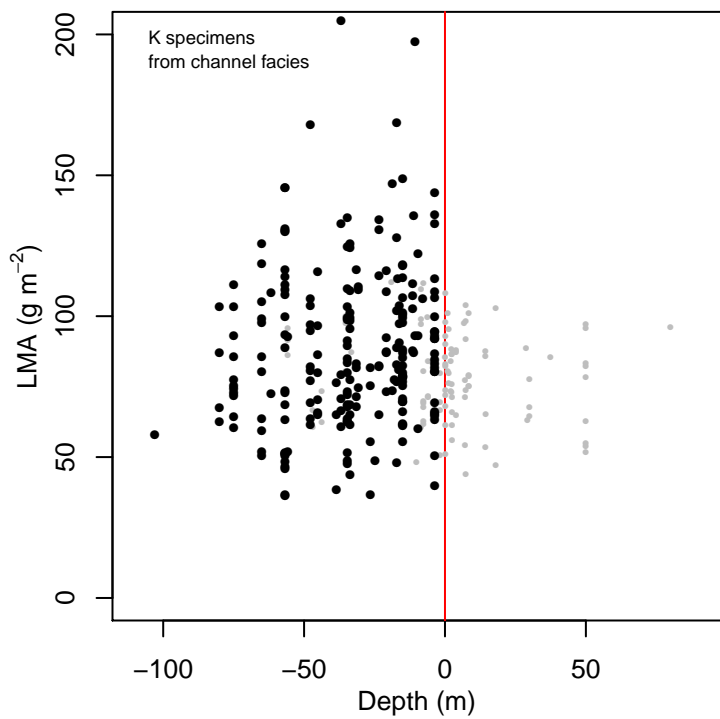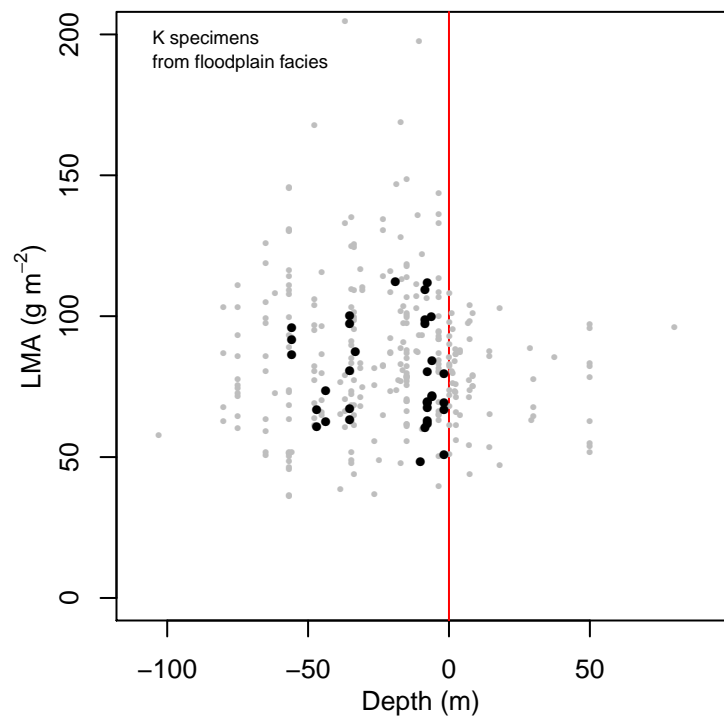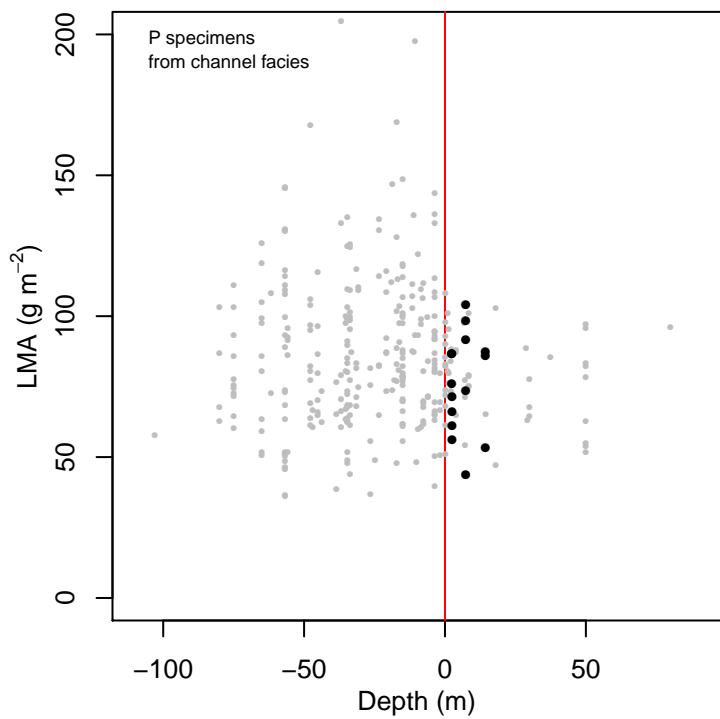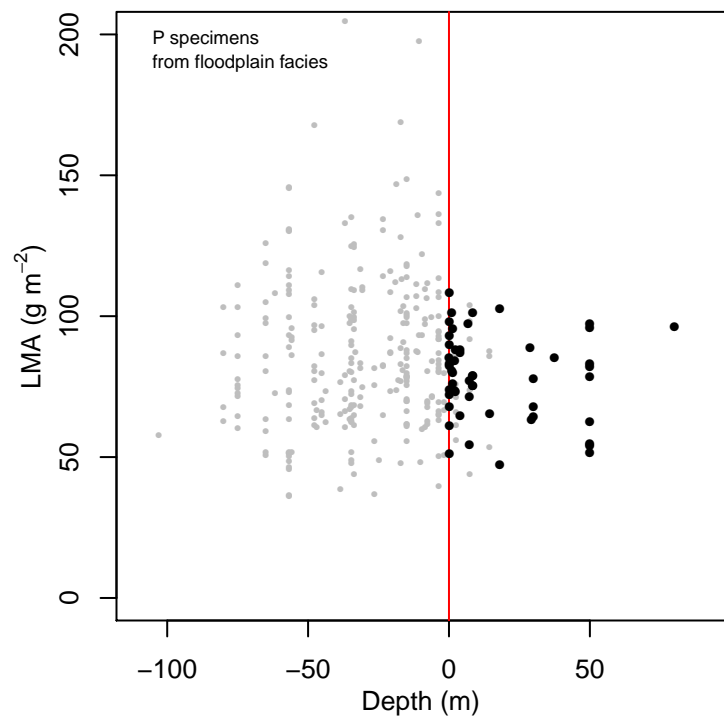

Supplement: pbio.1001949.s002.pdf [file pbio.1001949.s002.pdf]
